# Supplementary material for: Genomic Prediction of Tree Height, Wood Stiffness, and Male Flower Quantity Traits across Two Generations in Selected Individuals of Cryptomeria japonica D. Don (Japanese Cedar)
Source: MDPI journal article supplement (doi:10.3390/f14102097), 2023-10-19
Supplement: s1 [file s1]

**Table S4.** Numbers of individuals and mean male flower index survey scores used to calculate male flower quantity Clonal values for each clone.

| Table S4. Numbers of individuals and mean male flower index survey scores used to calculate male flower quality Clonal values for each clone. |             |      |      |      |      |      |      |      |      |      |      |      |      |      |       |      |      |       |                 |          |            |              |
|-----------------------------------------------------------------------------------------------------------------------------------------------|-------------|------|------|------|------|------|------|------|------|------|------|------|------|------|-------|------|------|-------|-----------------|----------|------------|--------------|
| Generation                                                                                                                                    | Clone       | Year | 2008 |      | 2009 |      | 2010 |      | 2011 |      | 2012 |      | 2013 |      | Total |      |      | Score | Published Score | modified | Statistics | Clonal value |
|                                                                                                                                               |             |      | N    | Mean | N     | Mean | N    |       |                 |          |            |              |
| G1                                                                                                                                            | P3122_sag1  | -    |      |      |      |      |      |      |      |      |      |      |      |      |       |      |      | 2     |                 |          | Z-score    | -0.70        |
| G1                                                                                                                                            | P3123_sag2  | -    |      |      |      |      |      |      |      |      |      |      |      |      |       |      |      | 3     |                 |          | Z-score    | 0.02         |
| G1                                                                                                                                            | P3124_sag3  | -    |      |      |      |      |      |      |      |      |      |      |      |      |       |      |      | 1     |                 |          | Z-score    | -1.42        |
| G1                                                                                                                                            | P3126_fuj1  | -    |      |      |      |      |      |      |      |      |      |      |      |      |       |      |      | 4     |                 |          | Z-score    | 0.74         |
| G1                                                                                                                                            | P3127_fuj2  | -    |      |      |      |      |      |      |      |      |      |      |      |      |       |      |      | 4     |                 |          | Z-score    | 0.74         |
| G1                                                                                                                                            | P3129_fuj5  | -    |      |      |      |      |      |      |      |      |      |      |      |      |       |      |      | 3     |                 |          | Z-score    | 0.02         |
| G1                                                                                                                                            | P3130_fuj6  | -    |      |      |      |      |      |      |      |      |      |      |      |      |       |      |      | 3     |                 |          | Z-score    | 0.02         |
| G1                                                                                                                                            | P3132_fuj8  | -    |      |      |      |      |      |      |      |      |      |      |      |      |       |      |      | 3     |                 |          | Z-score    | 0.02         |
| G1                                                                                                                                            | P3133_fuj9  | -    |      |      |      |      |      |      |      |      |      |      |      |      |       |      |      | 5     |                 |          | Z-score    | 1.46         |
| G1                                                                                                                                            | P3134_fuj10 | -    |      |      |      |      |      |      |      |      |      |      |      |      |       |      |      | 2     |                 |          | Z-score    | -0.70        |
| G1                                                                                                                                            | P3135_fuj11 | -    |      |      |      |      |      |      |      |      |      |      |      |      |       |      |      | 3     |                 |          | Z-score    | 0.02         |
| G1                                                                                                                                            | P3136_fuj12 | -    |      |      |      |      |      |      |      |      |      |      |      |      |       |      |      | 3     |                 |          | Z-score    | 0.02         |
| G1                                                                                                                                            | P3138_fuj14 | -    |      |      |      |      |      |      |      |      |      |      |      |      |       |      |      | 1     |                 |          | Z-score    | -1.42        |
| G1                                                                                                                                            | P3139_fuj15 | -    |      |      |      |      |      |      |      |      |      |      |      |      |       |      |      | 1     |                 |          | Z-score    | -1.42        |
| G1                                                                                                                                            | P3140_fuj16 | -    |      |      |      |      |      |      |      |      |      |      |      |      |       |      |      | 2     |                 |          | Z-score    | -0.70        |
| G1                                                                                                                                            | P3141_fuj17 | -    |      |      |      |      |      |      |      |      |      |      |      |      |       |      |      | 4     |                 |          | Z-score    | 0.74         |
| G1                                                                                                                                            | P3143_fuj19 | -    |      |      |      |      |      |      |      |      |      |      |      |      |       |      |      | 3     |                 |          | Z-score    | 0.02         |
| G1                                                                                                                                            | P3144_fuj20 | -    |      |      |      |      |      |      |      |      |      |      |      |      |       |      |      | 2     |                 |          | Z-score    | -0.70        |
| G1                                                                                                                                            | P3145_fuj21 | -    |      |      |      |      |      |      |      |      |      |      |      |      |       |      |      | 3     |                 |          | Z-score    | 0.02         |
| G1                                                                                                                                            | P3146_fuj22 | -    |      |      |      |      |      |      |      |      |      |      |      |      |       |      |      | 1     |                 |          | Z-score    | -1.42        |
| G1                                                                                                                                            | P3147_fuj24 | -    |      |      |      |      |      |      |      |      |      |      |      |      |       |      |      | 4     |                 |          | Z-score    | 0.74         |
| G1                                                                                                                                            | P3148_fuj25 | -    |      |      |      |      |      |      |      |      |      |      |      |      |       |      |      | 3     | 5→3             |          | Z-score    | 0.02         |
| G1                                                                                                                                            | P3149_fuj26 | -    |      |      |      |      |      |      |      |      |      |      |      |      |       |      |      | 3     |                 |          | Z-score    | 0.02         |
| G1                                                                                                                                            | P3150_fuj27 | -    |      |      |      |      |      |      |      |      |      |      |      |      |       |      |      | 3     |                 |          | Z-score    | 0.02         |
| G1                                                                                                                                            | P3151_fuj28 | -    |      |      |      |      |      |      |      |      |      |      |      |      |       |      |      | 3     |                 |          | Z-score    | 0.02         |
| G1                                                                                                                                            | P3152_fuj29 | -    |      |      |      |      |      |      |      |      |      |      |      |      |       |      |      | 3     |                 |          | Z-score    | 0.02         |
| G1                                                                                                                                            | P3153_ima1  | -    |      |      |      |      |      |      |      |      |      |      |      |      |       |      |      | 3     |                 |          | Z-score    | 0.02         |
| G1                                                                                                                                            | P3154_ima2  | -    |      |      |      |      |      |      |      |      |      |      |      |      |       |      |      | 3     |                 |          | Z-score    | 0.02         |
| G1                                                                                                                                            | P3155_kan1  | -    |      |      |      |      |      |      |      |      |      |      |      |      |       |      |      | 4     |                 |          | Z-score    | 0.74         |
| G1                                                                                                                                            | P3156_kan2  | -    |      |      |      |      |      |      |      |      |      |      |      |      |       |      |      | 3     |                 |          | Z-score    | 0.02         |
| G1                                                                                                                                            | P3157_kan3  | -    |      |      |      |      |      |      |      |      |      |      |      |      |       |      |      | 5     |                 |          | Z-score    | 1.46         |
| G1                                                                                                                                            | P3158_kan4  | -    |      |      |      |      |      |      |      |      |      |      |      |      |       |      |      | 2     |                 |          | Z-score    | -0.70        |
| G1                                                                                                                                            | P3162_kar1  | -    |      |      |      |      |      |      |      |      |      |      |      |      |       |      |      | 3     |                 |          | Z-score    | 0.02         |
| G1                                                                                                                                            | P3163_kar2  | -    |      |      |      |      |      |      |      |      |      |      |      |      |       |      |      | 1     |                 |          | Z-score    | -1.42        |
| G1                                                                                                                                            | P3164_kar3  | -    |      |      |      |      |      |      |      |      |      |      |      |      |       |      |      | 2     |                 |          | Z-score    | -0.70        |
| G1                                                                                                                                            | P3165_kar4  | -    |      |      |      |      |      |      |      |      |      |      |      |      |       |      |      | 4     |                 |          | Z-score    | 0.74         |
| G1                                                                                                                                            | P3166_kar5  | -    |      |      |      |      |      |      |      |      |      |      |      |      |       |      |      | 1     |                 |          | Z-score    | -1.42        |
| G1                                                                                                                                            | P3167_kar6  | -    |      |      |      |      |      |      |      |      |      |      |      |      |       |      |      | 1     |                 |          | Z-score    | -1.42        |
| G1                                                                                                                                            | P3168_kar7  | -    |      |      |      |      |      |      |      |      |      |      |      |      |       |      |      | 2     |                 |          | Z-score    | -0.70        |
| G1                                                                                                                                            | P3169_kar8  | -    |      |      |      |      |      |      |      |      |      |      |      |      |       |      |      | 1     |                 |          | Z-score    | -1.42        |
| G1                                                                                                                                            | P3170_kar10 | -    |      |      |      |      |      |      |      |      |      |      |      |      |       |      |      | 1     |                 |          | Z-score    | -1.42        |
| G1                                                                                                                                            | P3171_kar11 | -    |      |      |      |      |      |      |      |      |      |      |      |      |       |      |      | 4     |                 |          | Z-score    | 0.74         |
| G1                                                                                                                                            | P3172_kis1  | -    |      |      |      |      |      |      |      |      |      |      |      |      |       |      |      | 1     |                 |          | Z-score    | -1.42        |
| G1                                                                                                                                            | P3173_kis2  | -    |      |      |      |      |      |      |      |      |      |      |      |      |       |      |      | 3     |                 |          | Z-score    | 0.02         |
| G1                                                                                                                                            | P3086_yam1  | -    |      |      |      |      |      |      |      |      |      |      |      |      |       |      |      | 3     |                 |          | Z-score    | 0.02         |
| G1                                                                                                                                            | P3091_yam9  | -    |      |      |      |      |      |      |      |      |      |      |      |      |       |      |      | 3     |                 |          | Z-score    | 0.02         |
| G1                                                                                                                                            | P3107_kas1  | -    |      |      |      |      |      |      |      |      |      |      |      |      |       |      |      | 4     |                 |          | Z-score    | 0.74         |
| G2                                                                                                                                            | F1103_A-3   | 6    | 6    | 1.17 | 5    | 1.00 | 23   | 1.74 | 14   | 1.00 | 14   | 1.00 | 7    | 1.29 | 69    | 1.20 | 41.9 | 2     |                 |          | BLUP       | -0.54        |
| G2                                                                                                                                            | F1107_A-7   | 5    | 7    | 1.71 | 8    | 1.25 | 8    | 2.75 | 8    | 1.75 | 8    | 1.50 |      |      | 39    | 1.79 | 49.2 | 3     |                 |          | BLUP       | 0.08         |
| G2                                                                                                                                            | F1111_A-11  | 6    | 8    | 1.13 | 9    | 1.67 | 26   | 1.54 | 17   | 1.18 | 17   | 1.12 | 9    | 1.44 | 86    | 1.34 | 43.7 | 2     |                 |          | BLUP       | -0.47        |
| G2                                                                                                                                            | F1112_A-12  | 6    | 9    | 1.00 | 8    | 1.00 | 24   | 1.92 | 16   | 1.13 | 16   | 2.00 | 8    | 2.50 | 81    | 1.59 | 46.7 | 3     |                 |          | BLUP       | -0.17        |
| G2                                                                                                                                            | F1120_A-20  | 6    | 10   | 1.10 | 9    | 1.00 | 25   | 1.16 | 16   | 1.00 | 16   | 1.25 | 7    | 1.29 | 83    | 1.13 | 41.1 | 2     |                 |          | BLUP       | -0.66        |
| G2                                                                                                                                            | F1121_A-21  | 6    | 6    | 1.83 | 6    | 1.33 | 24   | 1.96 | 15   | 1.60 | 15   | 2.80 | 9    | 1.67 | 75    | 1.87 | 50.1 | 3     |                 |          | BLUP       | 0.11         |
| G2                                                                                                                                            | F1122_A-22  | 6    | 10   | 1.40 | 9    | 1.11 | 27   | 1.33 | 18   | 1.33 | 18   | 2.11 | 8    | 2.88 | 90    | 1.69 | 48.0 | 3     |                 |          | BLUP       | -0.20        |
| G2                                                                                                                                            | F1128_A-28  | 6    | 9    | 1.22 | 9    | 1.56 | 20   | 2.30 | 15   | 1.00 | 15   | 2.40 | 6    | 1.67 | 74    | 1.69 | 47.9 | 3     |                 |          | BLUP       | -0.01        |
| G2                                                                                                                                            | F1130_A-30  | 6    | 12   | 1.67 | 12   | 1.25 | 27   | 1.89 | 18   | 1.06 | 15   | 1.60 | 9    | 1.56 | 93    | 1.50 | 45.6 | 3     |                 |          | BLUP       | -0.25        |
| G2                                                                                                                                            | F1131_A-31  | 5    | 10   | 1.00 | 10   | 1.00 | 9    | 4.44 | 8    | 1.00 | 8    | 3.38 |      |      | 45    | 2.16 | 53.7 | 3     |                 |          | BLUP       | 0.41         |
| G2                                                                                                                                            | F1136_A-36  | 5    | 8    | 1.88 | 8    | 1.13 | 7    | 1.29 | 7    | 1.00 | 7    | 2.57 |      |      | 37    | 1.57 | 46.5 | 3     |                 |          | BLUP       | -0.12        |
| G2                                                                                                                                            | F1137_A-37  | 6    | 13   | 2.31 | 12   | 1.75 | 21   | 3.10 | 17   | 3.29 | 17   | 2.88 | 8    | 2.38 | 88    | 2.62 | 59.2 | 4     |                 |          | BLUP       | 0.92         |
| G2                                                                                                                                            | F1140_A-40  | 5    | 9    | 1.00 | 9    | 1.56 | 8    | 1.13 | 8    | 1.00 | 8    | 1.00 |      |      | 42    | 1.14 | 41.2 | 2     |                 |          | BLUP       | -0.53        |
| G2                                                                                                                                            | F1141_A-41  | 6    | 9    | 2.22 | 11   | 1.55 | 23   | 1.96 | 16   | 2.56 | 16   | 2.69 | 7    | 2.00 | 82    | 2.16 | 53.7 | 3     |                 |          | BLUP       | 0.39         |
| G2                                                                                                                                            | F1148_A-48  | 6    | 7    | 2.29 | 7    | 1.00 | 23   | 1.87 | 15   | 1.27 | 15   | 1.67 | 7    | 1.71 | 74    | 1.63 | 47.2 | 3     |                 |          | BLUP       | -0.17        |
| G2                                                                                                                                            | F1149_A-49  | 5    | 10   | 1.00 | 11   | 1.00 | 9    | 1.22 | 9    | 1.00 | 9    | 1.00 |      |      | 48    | 1.04 | 40.1 | 2     |                 |          | BLUP       | -0.63        |
| G2                                                                                                                                            | F1163_A-63  | 6    | 8    | 1.13 | 7    | 1.00 | 24   | 1.04 | 16   | 1.13 | 16   | 1.13 | 7    | 1.71 | 78    | 1.19 | 41.8 | 2     |                 |          | BLUP       | -0.67        |
| G2                                                                                                                                            | F1166_A-66  | 6    | 8    | 2.13 | 7    | 1.29 | 24   | 2.75 | 14   | 1.21 | 14   | 2.14 | 5    | 2.00 | 72    | 1.92 | 50.7 | 3     |                 |          | BLUP       | 0.25         |
| G2                                                                                                                                            | F1171_A-71  | 6    | 12   | 1.92 | 10   | 1.00 | 27   | 1.26 | 18   | 1.11 | 18   | 1.61 | 9    | 1.67 | 94    | 1.43 | 44.7 | 2     |                 |          | BLUP       | -0.41        |
| G2                                                                                                                                            | F1172_A-72  | 5    |      |      | 7    | 1.00 | 7    | 1.00 | 7    | 1.00 | 7    | 1.00 | 7    | 1.29 | 35    | 1.06 | 40.2 | 2     |                 |          | BLUP       | -0.73        |
| G2                                                                                                                                            | F1176_A-76  | 5    |      |      | 9    | 1.22 | 9    | 3.11 | 9    | 2.78 | 9    | 2.33 | 9    | 3.67 | 45    | 2.62 | 59.3 | 4     |                 |          | BLUP       | 0.78         |
| G2                                                                                                                                            | F1210_B-10  | 6    | 11   | 1.09 | 12   | 1.25 | 20   | 1.10 | 16   | 1.19 | 16   | 1.00 | 7    | 1.14 | 82    | 1.13 | 41.1 | 2     |                 |          | BLUP       | -0.65        |
| G2                                                                                                                                            | F1214_B-14  | 5    |      |      | 9    | 1.00 | 9    | 1.00 | 9    | 1.00 | 9    | 1.00 | 9    | 1.11 | 45    | 1.02 | 39.8 | 2     |                 |          | BLUP       | -0.76        |
| G2                                                                                                                                            | F1216_B-16  | 5    |      |      | 5    | 1.00 | 5    | 1.00 | 5    | 1.00 | 5    | 1.00 | 5    | 1.80 | 25    | 1.16 | 41.5 | 2     |                 |          | BLUP       | -0.61        |
| G2                                                                                                                                            | F1218_B-18  | 5    |      |      | 9    | 1.11 | 9    | 2.33 | 9    | 2.44 | 9    | 2.33 | 9    | 3.56 | 45    | 2.36 | 56.0 | 4     |                 |          | BLUP       | 0.52         |
| G2                                                                                                                                            | F1220_B-20  | 6    | 15   | 3.20 | 16   | 1.88 | 28   | 4.46 | 19   | 4.11 | 19   | 4.42 | 9    | 4.33 | 106   | 3.73 | 72.8 | 5     |                 |          | BLUP       | 2.00         |
| G2                                                                                                                                            | F1221_B-21  | 5    |      |      | 9    | 1.00 | 9    | 1.00 | 9    | 1.00 | 9    | 1.00 | 9    | 1.33 | 45    | 1.07 | 40.3 | 2     |                 |          | BLUP       | -0.72        |
| G2                                                                                                                                            | F1222_B-22  | 5    |      |      | 9    | 1.00 | 9    | 1.00 | 9    | 1.00 | 9    | 1.11 | 9    | 1.44 | 45    | 1.11 | 40.9 | 2     |                 |          | BLUP       | -0.68        |
| G2                                                                                                                                            | F1226_B-26  | 5    |      |      | 9    | 1.11 | 9    | 2.67 | 9    |      |      |      |      |      |       |      |      |       |                 |          |            |              |

**Table S4.** Numbers of individuals and mean male flower index survey scores used to calculate male flower quantity Clonal values for each clone.

| Generation | Clone           | Year | 2008 |      | 2009 |      | 2010 |      | 2011 |      | 2012 |      | 2013 |      | Total |      |         | Score | Published Score | modified | Statistics | Clonal value |
|------------|-----------------|------|------|------|------|------|------|------|------|------|------|------|------|------|-------|------|---------|-------|-----------------|----------|------------|--------------|
|            |                 |      | N    | Mean | N     | Mean | z-score |       |                 |          |            |              |
| G2         | F1238_B-38      | 6    | 10   | 1.00 | 9    | 1.11 | 21   | 1.43 | 14   | 1.00 | 15   | 1.00 | 6    | 1.17 | 75    | 1.12 | 40.9    | 2     |                 |          | BLUP       | -0.64        |
| G2         | F1240_B-40      | 5    |      |      | 7    | 1.00 | 7    | 1.14 | 8    | 1.00 | 8    | 1.00 | 8    | 1.13 | 38    | 1.05 | 40.2    | 2     |                 |          | BLUP       | -0.74        |
| G2         | F1250_B-50      | 5    |      |      | 9    | 1.56 | 9    | 3.00 | 9    | 3.78 | 9    | 4.33 | 9    | 4.67 | 45    | 3.47 | 69.6    | 5     |                 |          | BLUP       | 1.59         |
| G2         | F1254_B-54      | 6    | 13   | 1.00 | 12   | 1.33 | 25   | 1.24 | 16   | 1.13 | 17   | 1.24 | 8    | 1.88 | 91    | 1.30 | 43.2    | 2     |                 |          | BLUP       | -0.53        |
| G2         | F1255_B-55      | 5    |      |      | 8    | 1.00 | 9    | 1.00 | 9    | 1.11 | 9    | 1.00 | 9    | 1.22 | 44    | 1.07 | 40.3    | 2     |                 |          | BLUP       | -0.73        |
| G2         | F1256_B-56      | 5    |      |      | 9    | 1.00 | 9    | 1.00 | 9    | 1.00 | 9    | 1.00 | 9    | 1.22 | 45    | 1.04 | 40.1    | 2     |                 |          | BLUP       | -0.74        |
| G2         | F1259_B-59      | 6    | 12   | 1.58 | 12   | 1.00 | 27   | 2.41 | 18   | 1.67 | 18   | 1.94 | 9    | 2.67 | 96    | 1.88 | 50.2    | 3     |                 |          | BLUP       | 0.12         |
| G2         | F1261_B-61      | 5    |      |      | 9    | 1.00 | 9    | 1.00 | 9    | 1.33 | 9    | 1.22 | 9    | 1.44 | 45    | 1.20 | 42.0    | 2     |                 |          | BLUP       | -0.59        |
| G2         | F1265_B-65      | 6    | 11   | 1.18 | 10   | 1.00 | 25   | 1.08 | 16   | 1.56 | 16   | 1.63 | 7    | 2.14 | 85    | 1.43 | 44.8    | 2     |                 |          | BLUP       | -0.43        |
| G2         | F1274_B-74      | 6    | 12   | 1.83 | 20   | 1.15 | 36   | 1.83 | 27   | 1.33 | 27   | 1.48 | 18   | 2.11 | 140   | 1.62 | 47.1    | 3     |                 |          | BLUP       | -0.20        |
| G2         | F1275_B-75      | 5    |      |      | 9    | 1.00 | 9    | 1.00 | 9    | 1.22 | 9    | 1.00 | 9    | 1.00 | 45    | 1.04 | 40.1    | 2     |                 |          | BLUP       | -0.75        |
| G2         | F1282_B-82      | 6    | 9    | 1.11 | 8    | 1.25 | 21   | 1.10 | 14   | 1.00 | 14   | 1.00 | 7    | 1.29 | 73    | 1.12 | 41.0    | 2     |                 |          | BLUP       | -0.70        |
| G2         | F1293_B-93      | 6    | 10   | 1.20 | 9    | 1.00 | 26   | 1.04 | 17   | 1.00 | 17   | 1.00 | 9    | 1.00 | 88    | 1.04 | 40.0    | 2     |                 |          | BLUP       | -0.77        |
| G2         | F1294_B-94      | 6    | 9    | 1.00 | 9    | 1.00 | 25   | 1.08 | 16   | 1.00 | 16   | 1.00 | 9    | 1.11 | 84    | 1.03 | 39.9    | 2     |                 |          | BLUP       | -0.77        |
| G2         | F1303_ima_33-11 | 5    |      |      | 9    | 1.00 | 9    | 1.00 | 9    | 1.00 | 9    | 2.00 | 9    | 3.00 | 45    | 1.60 | 46.8    | 3     |                 |          | BLUP       | -0.21        |
| G2         | F1304_ima_24-5  | 5    |      |      | 9    | 1.00 | 9    | 1.00 | 9    | 1.00 | 9    | 1.56 | 9    | 1.67 | 45    | 1.24 | 42.5    | 2     |                 |          | BLUP       | -0.55        |
| G2         | F1306_oom_05-06 | 5    |      |      | 6    | 1.00 | 6    | 2.67 | 9    | 2.22 | 9    | 2.78 | 9    | 2.89 | 39    | 2.31 | 55.5    | 3     |                 |          | BLUP       | 0.51         |
| G2         | F1307_oom_07-07 | 5    |      |      | 6    | 1.33 | 6    | 1.00 | 9    | 1.78 | 9    | 1.78 | 9    | 1.67 | 39    | 1.51 | 45.7    | 3     |                 |          | BLUP       | -0.28        |
| G2         | F1308_oom_31-03 | 5    |      |      | 6    | 1.00 | 6    | 2.00 | 8    | 1.00 | 9    | 1.89 | 9    | 1.67 | 38    | 1.51 | 45.7    | 3     |                 |          | BLUP       | -0.32        |
| G2         | F1309_oom_24-12 | 5    |      |      | 5    | 1.00 | 5    | 1.00 | 8    | 1.00 | 8    | 1.00 | 8    | 1.38 | 34    | 1.08 | 40.4    | 2     |                 |          | BLUP       | -0.74        |
| G2         | F1310_oom_20-04 | 5    |      |      | 6    | 1.00 | 6    | 1.00 | 9    | 1.00 | 9    | 1.22 | 9    | 1.11 | 39    | 1.07 | 40.3    | 2     |                 |          | BLUP       | -0.75        |
| G2         | F1312_oom_05-08 | 5    |      |      | 6    | 1.00 | 6    | 1.00 | 9    | 1.67 | 9    | 1.78 | 9    | 1.44 | 39    | 1.38 | 44.1    | 2     |                 |          | BLUP       | -0.40        |
| G2         | F1313_oom_05-03 | 5    |      |      | 6    | 1.00 | 6    | 1.50 | 9    | 1.22 | 9    | 1.11 | 9    | 1.00 | 39    | 1.17 | 41.5    | 2     |                 |          | BLUP       | -0.67        |
| G2         | F1314_oom_08-04 | 5    |      |      | 6    | 1.00 | 6    | 1.00 | 9    | 1.00 | 9    | 1.00 | 9    | 1.00 | 39    | 1.00 | 39.5    | 2     |                 |          | BLUP       | -0.82        |
| G2         | F1315_tar_11-01 | 5    |      |      | 3    | 1.00 | 4    | 1.00 | 4    | 1.00 | 4    | 1.00 | 5    | 1.00 | 20    | 1.00 | 39.5    | 2     |                 |          | BLUP       | -0.80        |
| G2         | F1316_tar_11-03 | 5    |      |      | 6    | 1.00 | 6    | 1.33 | 9    | 2.22 | 9    | 1.56 | 9    | 2.00 | 39    | 1.62 | 47.1    | 3     |                 |          | BLUP       | -0.16        |
| G2         | F1317_tar_08-12 | 5    |      |      | 6    | 1.00 | 6    | 1.67 | 8    | 4.25 | 9    | 3.33 | 9    | 3.00 | 38    | 2.65 | 59.6    | 4     |                 |          | BLUP       | 0.91         |
| G2         | F1318_tar_10-01 | 5    |      |      | 6    | 1.00 | 6    | 3.00 | 9    | 1.67 | 9    | 2.78 | 8    | 3.00 | 38    | 2.29 | 55.2    | 4     |                 |          | BLUP       | 0.45         |
| G2         | F1319_tar_08-06 | 5    |      |      | 6    | 1.00 | 6    | 1.00 | 9    | 1.44 | 9    | 1.22 | 9    | 2.44 | 39    | 1.42 | 44.7    | 2     |                 |          | BLUP       | -0.35        |
| G2         | F1320_tar_08-02 | 5    |      |      | 6    | 1.00 | 6    | 1.17 | 8    | 1.75 | 9    | 1.22 | 9    | 2.00 | 38    | 1.43 | 44.7    | 2     |                 |          | BLUP       | -0.37        |
| G2         | F1321_tar_13-10 | 5    |      |      | 5    | 1.00 | 5    | 1.00 | 8    | 1.00 | 8    | 1.25 | 8    | 1.25 | 34    | 1.10 | 40.7    | 2     |                 |          | BLUP       | -0.71        |
| G2         | F1322_tar_10-07 | 5    |      |      | 6    | 1.00 | 6    | 2.83 | 9    | 2.22 | 9    | 2.11 | 9    | 2.11 | 39    | 2.06 | 52.4    | 3     |                 |          | BLUP       | 0.21         |
| G2         | F1323_tar_08-09 | 5    |      |      | 6    | 1.00 | 6    | 1.00 | 6    | 1.33 | 6    | 2.17 | 6    | 2.17 | 30    | 1.53 | 46.0    | 3     |                 |          | BLUP       | -0.27        |
| G2         | F1324_tar_08-11 | 5    |      |      | 6    | 1.33 | 6    | 1.50 | 9    | 2.67 | 9    | 2.22 | 9    | 2.89 | 39    | 2.12 | 53.2    | 3     |                 |          | BLUP       | 0.37         |
| G2         | F1325_tar_10-06 | 5    |      |      | 6    | 1.00 | 6    | 2.67 | 9    | 1.67 | 9    | 1.44 | 9    | 2.33 | 39    | 1.82 | 49.5    | 3     |                 |          | BLUP       | -0.03        |
| G2         | F1326_ima-1     | 4    |      |      |      |      | 6    | 1.00 | 9    | 1.00 | 9    | 2.22 | 9    | 2.78 | 33    | 1.75 | 48.7    | 3     |                 |          | BLUP       | -0.13        |
| G2         | F1327_ima-2     | 4    |      |      |      |      | 3    | 1.00 | 9    | 1.00 | 9    | 1.67 | 9    | 2.22 | 30    | 1.47 | 45.3    | 3     |                 |          | BLUP       | -0.38        |
| G2         | F1328_ima-3     | 4    |      |      |      |      | 1    | 1.00 | 3    | 1.00 | 3    | 3.67 | 3    | 3.67 | 10    | 2.33 | 55.8    | 4     |                 |          | BLUP       | 0.54         |
| G2         | F1329_ima-4     | 4    |      |      |      |      | 4    | 3.25 | 4    | 3.25 | 5    | 4.00 | 4    | 4.00 | 17    | 3.63 | 71.5    | 5     |                 |          | BLUP       | 1.53         |
| G2         | F1330_ima-5     | 4    |      |      |      |      | 6    | 1.33 | 7    | 1.00 | 7    | 2.57 | 7    | 1.86 | 27    | 1.69 | 47.9    | 3     |                 |          | BLUP       | -0.24        |
| G2         | F1331_ima-6     | 4    |      |      |      |      | 6    | 3.50 | 9    | 3.11 | 9    | 3.56 | 9    | 2.67 | 33    | 3.21 | 66.4    | 5     |                 |          | BLUP       | 1.16         |
| G2         | F1332_ima-7     | 4    |      |      |      |      | 3    | 3.00 | 9    | 1.00 | 9    | 1.22 | 9    | 1.78 | 30    | 1.75 | 48.7    | 3     |                 |          | BLUP       | -0.44        |
| G2         | F1333_ima-8     | 4    |      |      |      |      | 3    | 1.00 | 9    | 1.00 | 9    | 1.00 | 9    | 1.33 | 30    | 1.08 | 40.5    | 2     |                 |          | BLUP       | -0.82        |
| G2         | F1334_ima-9     | 4    |      |      |      |      | 6    | 1.00 | 7    | 1.00 | 7    | 1.57 | 7    | 2.29 | 27    | 1.46 | 45.2    | 3     |                 |          | BLUP       | -0.44        |
| G2         | F1335_ima-10    | 4    |      |      |      |      | 3    | 1.00 | 8    | 1.00 | 8    | 1.00 | 8    | 1.00 | 27    | 1.00 | 39.5    | 2     |                 |          | BLUP       | -0.92        |
| G2         | F1336_ima-11    | 4    |      |      |      |      | 6    | 2.33 | 9    | 3.11 | 9    | 4.33 | 9    | 3.78 | 33    | 3.39 | 68.6    | 5     |                 |          | BLUP       | 1.45         |
| G2         | F1337_ima-12    | 4    |      |      |      |      | 3    | 2.67 | 9    | 1.00 | 9    | 2.11 | 9    | 2.22 | 30    | 2.00 | 51.7    | 3     |                 |          | BLUP       | -0.10        |
| G2         | F1338_ima-13    | 3    |      |      |      |      |      |      | 2    | 1.00 | 2    | 1.00 | 2    | 1.50 | 6     | 1.17 | 41.5    | 2     |                 |          | BLUP       | -0.63        |
| G2         | F1339_ima-14    | 4    |      |      |      |      | 4    | 1.75 | 2    | 1.00 | 2    | 4.50 | 2    | 3.00 | 10    | 2.56 | 58.6    | 4     |                 |          | BLUP       | 0.40         |
| G2         | F1340_sef-1     | 4    |      |      |      |      | 6    | 3.50 | 9    | 3.67 | 9    | 4.33 | 9    | 3.44 | 33    | 3.74 | 72.9    | 5     |                 |          | BLUP       | 1.71         |
| G2         | F1341_sef-2     | 4    |      |      |      |      | 6    | 1.67 | 9    | 1.33 | 9    | 3.00 | 9    | 3.22 | 33    | 2.31 | 55.4    | 4     |                 |          | BLUP       | 0.39         |
| G2         | F1342_sef-3     | 4    |      |      |      |      | 6    | 4.17 | 7    | 3.86 | 7    | 4.00 | 7    | 3.57 | 27    | 3.90 | 74.9    | 5     |                 |          | BLUP       | 1.82         |
| G2         | F1343_sef-4     | 4    |      |      |      |      | 6    | 2.00 | 9    | 1.67 | 9    | 3.00 | 9    | 3.11 | 33    | 2.44 | 57.1    | 4     |                 |          | BLUP       | 0.50         |
| G2         | F1344_sef-5     | 4    |      |      |      |      | 3    | 1.00 | 9    | 1.22 | 9    | 3.11 | 9    | 3.33 | 30    | 2.17 | 53.7    | 3     |                 |          | BLUP       | 0.42         |
| G2         | F1345_sef-6     | 4    |      |      |      |      | 5    | 1.40 | 4    | 1.75 | 4    | 3.50 | 4    | 2.00 | 17    | 2.16 | 53.7    | 3     |                 |          | BLUP       | 0.16         |
| G2         | F1346_sef-7     | 4    |      |      |      |      | 3    | 2.00 | 5    | 1.80 | 5    | 3.20 | 5    | 3.60 | 18    | 2.65 | 59.6    | 4     |                 |          | BLUP       | 0.69         |
| G2         | F1347_sef-8     | 4    |      |      |      |      | 3    | 4.67 | 3    | 5.00 | 3    | 5.00 | 3    | 5.00 | 12    | 4.92 | 87.3    | 5     |                 |          | BLUP       | 2.60         |
| G2         | F1348_sef-9     | 4    |      |      |      |      | 6    | 3.50 | 9    | 3.11 | 9    | 3.56 | 9    | 2.67 | 33    | 3.21 | 66.4    | 5     |                 |          | BLUP       | 1.16         |
| G2         | F1349_sef-10    | 4    |      |      |      |      | 6    | 1.00 | 9    | 1.00 | 9    | 1.67 | 9    | 2.00 | 33    | 1.42 | 44.6    | 2     |                 |          | BLUP       | -0.48        |
| G2         | F1350_sef-11    | 4    |      |      |      |      | 3    | 2.67 | 9    | 1.44 | 9    | 3.11 | 9    |      |       |      |         |       |                 |          |            |              |
