# Supplementary material for: Genomic Prediction of Tree Height, Wood Stiffness, and Male Flower Quantity Traits across Two Generations in Selected Individuals of Cryptomeria japonica D. Don (Japanese Cedar)
Source: MDPI journal article supplement (doi:10.3390/f14102097), 2023-10-19
Supplement: s1 [file s1]

Table S1. Numbers of clone and individuals surveyed and phenotyping ages used to estimate Clonal values for each trait.

| Trait     | Methods         | G1 (first generation) |        |             |                |       |                      | G2 (second generation) |       |             |                |       |                   | total |        |
|-----------|-----------------|-----------------------|--------|-------------|----------------|-------|----------------------|------------------------|-------|-------------|----------------|-------|-------------------|-------|--------|
|           |                 | Clone                 | N      | N/<br>clone | site/<br>clone | Age   | Statistics           | Clone                  | N     | N/<br>clone | site/<br>clone | Age   | Statistics        | Clone | N      |
| Tree      | Field survey    | 44                    | 11,860 | 269.5       | 4.4            | 10    | BLUP <sup>a</sup>    | 95                     | 3058  | 32.2        | 1.0            | 10    | BLUP <sup>a</sup> | 139   | 14,918 |
| height    | Published score | 3                     | -      | -           | -              | 10    | Z-score <sup>b</sup> |                        |       |             |                |       |                   | 3     | -      |
|           | total           | 47                    |        |             |                | 10    |                      | 95                     |       |             |                | 10    |                   | 142   |        |
| Wood      | Lumber survey   |                       |        |             |                |       |                      |                        |       |             |                |       |                   |       |        |
| stiffness | Individual      | 27                    | 202    | 7.5         | -              | 30~39 | BLUP <sup>a</sup>    | 46                     | 191   | 4.2         | -              | 30~39 | BLUP <sup>a</sup> | 73    | 393    |
|           | juvenile lumber |                       | (397)  | (14.7)      |                |       |                      |                        | (382) | (8.3)       |                |       |                   |       | (779)  |
|           | mature lumber   |                       | (252)  | (9.3)       |                |       |                      |                        | (372) | (8.1)       |                |       |                   |       | (624)  |
|           | Standing tree   |                       |        |             |                |       |                      |                        |       |             |                |       |                   |       |        |
|           | Fakopp          |                       |        |             |                |       |                      | 53                     | 416   | 7.8         | -              | 22~29 | Mean              | 53    | 416    |
|           | TreeSonic       | 17                    | 97     | 5.7         | -              | 30~39 | Mean                 | 2                      | 13    | 6.5         | -              | 30~39 | Mean              | 19    | 110    |
|           | total           | 44                    | 299    |             |                |       |                      | 101                    | 620   |             |                |       |                   | 145   | 919    |
| Male      | Field survey    |                       |        |             |                |       |                      | 101                    | 4640  | 45.9        | -              | 22~29 | BLUP <sup>a</sup> | 101   | 4640   |
| flower    | Published score | 47                    | -      | -           | -              | 15~   | Z-score*             |                        |       |             |                |       |                   | 47    | -      |
| quantity  | total           | 47                    |        |             |                |       |                      | 101                    |       |             |                |       |                   | 148   |        |

BLUP<sup>a</sup> (Best Linear Unbiased Prediction) is the same as Clonal value.

The Z-score<sup>b</sup> is the number of standard deviations by which a raw score deviates from the population mean and was calculated from the means and standard deviations of published scores.

For the tree height trait, the published scores for the three G1 clones that could not be field surveyed were converted into Clonal values using a BLUP-derived equation (see details in Supplementary Materials S1).

For wood stiffness, the mean stress wave times of the 72 clones (Fakopp: 53 clones, TreeSonic: 19 clones) surveyed as standing trees were similarly converted into Clonal values using a BLUP-derived equation (see details in Supplementary Materials S2).

For male flower quantity, the published scores for the 47 G1 clones that could not be field surveyed were converted into Clonal values using a BLUP-derived equation (see details in Supplementary Materials S3).

The numbers in parentheses in the Wood stiffness are the number of lumbers obtained by cutting each log.

The numbers of individuals surveyed for each clone are shown in the supplementary data (Height: Table S2, Wood stiffness: Table S3, Male flower quantity: Table S4).
