# Supplementary material for: Genomic Prediction of Tree Height, Wood Stiffness, and Male Flower Quantity Traits across Two Generations in Selected Individuals of Cryptomeria japonica D. Don (Japanese Cedar)
Source: MDPI journal article supplement (doi:10.3390/f14102097), 2023-10-19
Supplement: s1 [file s1]

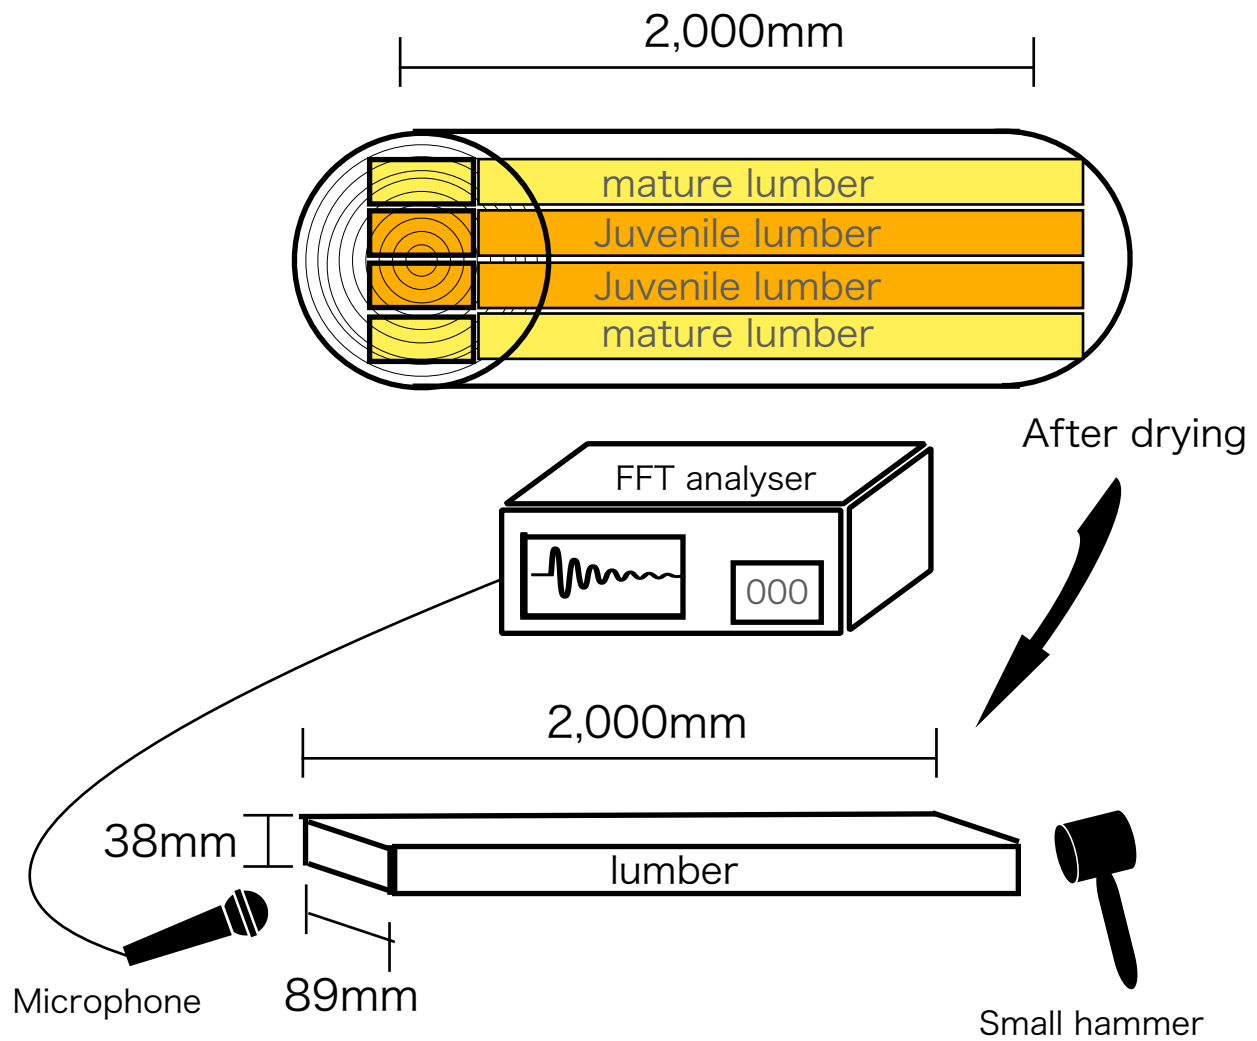

**Figure S2.** Methods for measuring wood stiffness of the lumber products (2000 x 38 x 89 mm) using an FFT analyser.
