# Supplementary material for: Genomic Prediction of Tree Height, Wood Stiffness, and Male Flower Quantity Traits across Two Generations in Selected Individuals of Cryptomeria japonica D. Don (Japanese Cedar)
Source: MDPI journal article supplement (doi:10.3390/f14102097), 2023-10-19
Supplement: s1 [file s1]

**Table S5.** Results of parent-child analysis with Cervus 3.0 using 900SNPS markers.

| Offspring(G2)   | Parent      |             |   |     |              |             |             |   |     |              | TrioLOD<br>score | TrioDelta<br>score | Trio<br>confidence |
|-----------------|-------------|-------------|---|-----|--------------|-------------|-------------|---|-----|--------------|------------------|--------------------|--------------------|
|                 | candidate_1 |             |   |     |              | candidate_2 |             |   |     |              |                  |                    |                    |
|                 | Clone (G1)  | mismatching |   |     | PairLODscore | Clone (G1)  | mismatching |   |     | PairLODscore |                  |                    |                    |
| F1103_A-3       | P3126_fuj1  | 0           | / | 900 | 74           | P3086_yam1  | 2           | / | 900 | 120          | 253              | 253                | ≥ 95%              |
| F1107_A-7       | P3126_fuj1  | 1           | / | 900 | 75           | P3086_yam1  | 0           | / | 900 | 130          | 278              | 278                | ≥ 95%              |
| F1111_A-11      | P3127_fuj2  | 1           | / | 900 | 106          | P3126_fuj1  | 0           | / | 900 | 94           | 265              | 265                | ≥ 95%              |
| F1112_A-12      | P3127_fuj2  | 1           | / | 900 | 111          | P3126_fuj1  | 0           | / | 900 | 83           | 253              | 253                | ≥ 95%              |
| F1120_A-20      | P3165_kar4  | 1           | / | 900 | 109          | P3126_fuj1  | 2           | / | 900 | 69           | 237              | 237                | ≥ 95%              |
| F1121_A-21      | P3165_kar4  | 0           | / | 900 | 123          | P3126_fuj1  | 1           | / | 900 | 77           | 263              | 263                | ≥ 95%              |
| F1122_A-22      | P3165_kar4  | 0           | / | 900 | 121          | P3126_fuj1  | 1           | / | 900 | 72           | 263              | 263                | ≥ 95%              |
| F1128_A-28      | P3153_ima1  | 1           | / | 900 | 103          | P3126_fuj1  | 2           | / | 900 | 63           | 241              | 241                | ≥ 95%              |
| F1130_A-30      | P3153_ima1  | 0           | / | 900 | 89           | P3126_fuj1  | 0           | / | 900 | 86           | 243              | 243                | ≥ 95%              |
| F1131_A-31      | P3153_ima1  | 0           | / | 900 | 90           | P3126_fuj1  | 1           | / | 900 | 65           | 238              | 238                | ≥ 95%              |
| F1136_A-36      | P3127_fuj2  | 2           | / | 900 | 110          | P3126_fuj1  | 0           | / | 900 | 99           | 278              | 278                | ≥ 95%              |
| F1137_A-37      | P3127_fuj2  | 0           | / | 900 | 101          | P3126_fuj1  | 1           | / | 900 | 90           | 254              | 254                | ≥ 95%              |
| F1140_A-40      | P3154_ima2  | 0           | / | 900 | 83           | P3086_yam1  | 1           | / | 900 | 89           | 250              | 250                | ≥ 95%              |
| F1141_A-41      | P3169_kar8  | 1           | / | 900 | 77           | P3126_fuj1  | 0           | / | 900 | 88           | 250              | 250                | ≥ 95%              |
| F1148_A-48      | P3169_kar8  | 1           | / | 900 | 64           | P3126_fuj1  | 1           | / | 900 | 76           | 213              | 205                | ≥ 95%              |
| F1149_A-49      | P3154_ima2  | 1           | / | 900 | 93           | Unknown1    | 34          | / | 900 | -129         | -143             | 0                  |                    |
| F1163_A-63      | P3154_ima2  | 1           | / | 900 | 86           | Unknown2    | 29          | / | 900 | -132         | -158             | 0                  |                    |
| F1166_A-66      | P3154_ima2  | 0           | / | 900 | 74           | Unknown3    | 29          | / | 900 | -137         | -155             | 0                  |                    |
| F1171_A-71      | P3091_yam9  | 0           | / | 900 | 114          | P3153_ima1  | 1           | / | 900 | 97           | 273              | 273                | ≥ 95%              |
| F1172_A-72      | P3091_yam9  | 3           | / | 900 | 86           | P3153_ima1  | 1           | / | 900 | 102          | 240              | 227                | ≥ 95%              |
| F1176_A-76      | P3169_kar8  | 1           | / | 900 | 82           | Unknown4    | 34          | / | 900 | -159         | -195             | 0                  |                    |
| F1210_B-10      | P3129_fuj5  | 0           | / | 900 | 67           | P3162_kar1  | 0           | / | 900 | 101          | 249              | 249                | ≥ 95%              |
| F1214_B-14      | P3129_fuj5  | 0           | / | 900 | 75           | P3162_kar1  | 0           | / | 900 | 81           | 234              | 234                | ≥ 95%              |
| F1216_B-16      | P3129_fuj5  | 0           | / | 900 | 91           | P3162_kar1  | 1           | / | 900 | 84           | 256              | 256                | ≥ 95%              |
| F1218_B-18      | P3129_fuj5  | 0           | / | 900 | 71           | P3153_ima1  | 0           | / | 900 | 90           | 231              | 231                | ≥ 95%              |
| F1220_B-20      | P3129_fuj5  | 0           | / | 900 | 69           | P3153_ima1  | 0           | / | 900 | 81           | 224              | 224                | ≥ 95%              |
| F1221_B-21      | P3129_fuj5  | 0           | / | 900 | 231          | Unknown5    | 67          | / | 900 | -251         | -6               | 0                  |                    |
| F1222_B-22      | P3129_fuj5  | 0           | / | 900 | 54           | P3126_fuj1  | 0           | / | 900 | 79           | 221              | 221                | ≥ 95%              |
| F1226_B-26      | P3129_fuj5  | 0           | / | 900 | 87           | Unknown6    | 35          | / | 900 | -152         | -148             | 0                  |                    |
| F1227_B-27      | P3129_fuj5  | 1           | / | 900 | 82           | P3170_kar10 | 1           | / | 900 | 119          | 275              | 275                | ≥ 95%              |
| F1229_B-29      | P3129_fuj5  | 0           | / | 900 | 72           | P3126_fuj1  | 0           | / | 900 | 59           | 217              | 217                | ≥ 95%              |
| F1230_B-30      | P3129_fuj5  | 0           | / | 900 | 70           | P3126_fuj1  | 0           | / | 900 | 62           | 224              | 224                | ≥ 95%              |
| F1238_B-38      | P3139_fuj15 | 0           | / | 900 | 91           | P3153_ima1  | 0           | / | 900 | 105          | 277              | 277                | ≥ 95%              |
| F1240_B-40      | P3139_fuj15 | 0           | / | 900 | 93           | P3153_ima1  | 0           | / | 900 | 99           | 279              | 279                | ≥ 95%              |
| F1250_B-50      | P3148_fuj25 | 0           | / | 900 | 87           | P3129_fuj5  | 0           | / | 900 | 96           | 245              | 245                | ≥ 95%              |
| F1254_B-54      | P3148_fuj25 | 0           | / | 900 | 84           | P3129_fuj5  | 0           | / | 900 | 93           | 249              | 249                | ≥ 95%              |
| F1255_B-55      | P3148_fuj25 | 0           | / | 900 | 92           | P3129_fuj5  | 0           | / | 900 | 109          | 275              | 275                | ≥ 95%              |
| F1256_B-56      | P3148_fuj25 | 0           | / | 900 | 89           | P3149_fuj26 | 1           | / | 900 | 95           | 249              | 249                | ≥ 95%              |
| F1259_B-59      | P3148_fuj25 | 0           | / | 900 | 99           | P3152_fuj29 | 0           | / | 900 | 130          | 286              | 286                | ≥ 95%              |
| F1261_B-61      | P3148_fuj25 | 3           | / | 900 | 87           | P3152_fuj29 | 0           | / | 900 | 132          | 278              | 278                | ≥ 95%              |
| F1265_B-65      | P3148_fuj25 | 0           | / | 900 | 97           | P3149_fuj26 | 1           | / | 900 | 88           | 256              | 256                | ≥ 95%              |
| F1274_B-74      | P3148_fuj25 | 1           | / | 900 | 94           | P3152_fuj29 | 1           | / | 900 | 125          | 274              | 274                | ≥ 95%              |
| F1275_B-75      | P3149_fuj26 | 2           | / | 900 | 85           | P3148_fuj25 | 1           | / | 900 | 105          | 252              | 252                | ≥ 95%              |
| F1282_B-82      | P3149_fuj26 | 0           | / | 900 | 86           | P3153_ima1  | 0           | / | 900 | 82           | 239              | 239                | ≥ 95%              |
| F1293_B-93      | P3162_kar1  | 3           | / | 900 | 102          | P3124_sag3  | 0           | / | 900 | 110          | 260              | 260                | ≥ 95%              |
| F1294_B-94      | P3162_kar1  | 0           | / | 900 | 113          | P3124_sag3  | 0           | / | 900 | 124          | 302              | 302                | ≥ 95%              |
| F1303_ima_33-11 | P3156_kan2  | 2           | / | 900 | 90           | P3152_fuj29 | 0           | / | 900 | 105          | 257              | 257                | ≥ 95%              |
| F1304_ima_24-5  | P3162_kar1  | 1           | / | 900 | 110          | P3154_ima2  | 0           | / | 900 | 100          | 262              | 262                | ≥ 95%              |
| F1306_oom_05-06 | P3154_ima2  | 1           | / | 900 | 83           | Unknown7    | 28          | / | 900 | -79          | -102             | 0                  |                    |
| F1307_oom_07-07 | P3154_ima2  | 0           | / | 900 | 69           | P3086_yam1  | 2           | / | 900 | 93           | 238              | 238                | ≥ 95%              |
| F1308_oom_31-03 | P3086_yam1  | 0           | / | 900 | 108          | P3127_fuj2  | 1           | / | 900 | 89           | 271              | 271                | ≥ 95%              |
| F1309_oom_24-12 | P3169_kar8  | 0           | / | 900 | 116          | P3091_yam9  | 3           | / | 900 | 125          | 269              | 269                | ≥ 95%              |
| F1310_oom_20-04 | P3169_kar8  | 1           | / | 900 | 84           | P3086_yam1  | 0           | / | 900 | 92           | 255              | 255                | ≥ 95%              |
| F1312_oom_05-08 | P3154_ima2  | 1           | / | 900 | 107          | Unknown8    | 28          | / | 900 | -71          | -55              | 0                  |                    |

**Table S5.** Results of parent-child analysis with Cervus 3.0 using 900SNPS markers.

| Offspring(G2)   | Parent      |             |   |     |              |             |             |   |     |              | TrioLOD<br>score | TrioDelta<br>score | Trio<br>confidence |
|-----------------|-------------|-------------|---|-----|--------------|-------------|-------------|---|-----|--------------|------------------|--------------------|--------------------|
|                 | candidate_1 |             |   |     |              | candidate_2 |             |   |     |              |                  |                    |                    |
|                 | Clone (G1)  | mismatching |   |     | PairLODscore | Clone (G1)  | mismatching |   |     | PairLODscore |                  |                    |                    |
| F1313_oom_05-03 | P3154_ima2  | 2           | / | 900 | 62           | Unknown9    | 35          | / | 900 | -105         | -122             | 0                  |                    |
| F1314_oom_08-04 | P3154_ima2  | 0           | / | 900 | 73           | P3086_yam1  | 1           | / | 900 | 88           | 231              | 231                | ≥ 95%              |
| F1315_tar_11-01 | P3139_fuj15 | 0           | / | 900 | 103          | P3129_fuj5  | 0           | / | 900 | 63           | 239              | 239                | ≥ 95%              |
| F1316_tar_11-03 | P3139_fuj15 | 1           | / | 900 | 103          | P3129_fuj5  | 0           | / | 900 | 62           | 247              | 247                | ≥ 95%              |
| F1317_tar_08-12 | P3129_fuj5  | 1           | / | 900 | 85           | P3107_kas1  | 0           | / | 900 | 93           | 246              | 246                | ≥ 95%              |
| F1318_tar_10-01 | P3139_fuj15 | 0           | / | 900 | 99           | P3126_fuj1  | 1           | / | 900 | 91           | 270              | 270                | ≥ 95%              |
| F1319_tar_08-06 | P3129_fuj5  | 0           | / | 900 | 82           | P3107_kas1  | 0           | / | 900 | 95           | 254              | 254                | ≥ 95%              |
| F1320_tar_08-02 | P3129_fuj5  | 0           | / | 900 | 80           | P3107_kas1  | 0           | / | 900 | 87           | 242              | 242                | ≥ 95%              |
| F1321_tar_13-10 | P3139_fuj15 | 0           | / | 900 | 98           | P3165_kar4  | 1           | / | 900 | 103          | 277              | 277                | ≥ 95%              |
| F1322_tar_10-07 | P3139_fuj15 | 1           | / | 900 | 97           | P3126_fuj1  | 1           | / | 900 | 71           | 236              | 236                | ≥ 95%              |
| F1323_tar_08-09 | P3129_fuj5  | 0           | / | 900 | 81           | P3107_kas1  | 0           | / | 900 | 98           | 251              | 251                | ≥ 95%              |
| F1324_tar_08-11 | P3129_fuj5  | 0           | / | 900 | 91           | P3107_kas1  | 0           | / | 900 | 96           | 268              | 268                | ≥ 95%              |
| F1325_tar_10-06 | P3139_fuj15 | 1           | / | 900 | 108          | P3126_fuj1  | 2           | / | 900 | 69           | 254              | 254                | ≥ 95%              |
| F1326_ima-1     | P3141_fuj17 | 2           | / | 900 | 101          | P3149_fuj26 | 0           | / | 900 | 77           | 256              | 256                | ≥ 95%              |
| F1327_ima-2     | P3141_fuj17 | 1           | / | 900 | 110          | P3149_fuj26 | 0           | / | 900 | 86           | 276              | 276                | ≥ 95%              |
| F1328_ima-3     | P3107_kas1  | 4           | / | 900 | 76           | P3149_fuj26 | 0           | / | 900 | 92           | 230              | 230                | ≥ 95%              |
| F1329_ima-4     | P3165_kar4  | 0           | / | 900 | 117          | P3129_fuj5  | 0           | / | 900 | 91           | 268              | 268                | ≥ 95%              |
| F1330_ima-5     | P3141_fuj17 | 5           | / | 900 | 102          | P3169_kar8  | 0           | / | 900 | 91           | 268              | 268                | ≥ 95%              |
| F1331_ima-6     | P3141_fuj17 | 2           | / | 900 | 107          | P3169_kar8  | 0           | / | 900 | 95           | 275              | 275                | ≥ 95%              |
| F1332_ima-7     | P3148_fuj25 | 2           | / | 900 | 90           | P3153_ima1  | 0           | / | 900 | 99           | 263              | 263                | ≥ 95%              |
| F1333_ima-8     | P3149_fuj26 | 0           | / | 900 | 77           | P3141_fuj17 | 0           | / | 900 | 109          | 264              | 264                | ≥ 95%              |
| F1334_ima-9     | P3149_fuj26 | 1           | / | 900 | 89           | P3162_kar1  | 1           | / | 900 | 88           | 253              | 253                | ≥ 95%              |
| F1335_ima-10    | P3162_kar1  | 2           | / | 900 | 85           | P3126_fuj1  | 0           | / | 900 | 79           | 242              | 242                | ≥ 95%              |
| F1336_ima-11    | P3162_kar1  | 1           | / | 900 | 96           | P3134_fuj10 | 0           | / | 900 | 97           | 262              | 262                | ≥ 95%              |
| F1337_ima-12    | P3162_kar1  | 0           | / | 900 | 105          | P3154_ima2  | 0           | / | 900 | 128          | 281              | 281                | ≥ 95%              |
| F1338_ima-13    | P3107_kas1  | 1           | / | 900 | 104          | P3149_fuj26 | 0           | / | 900 | 87           | 256              | 256                | ≥ 95%              |
| F1339_ima-14    | P3107_kas1  | 2           | / | 900 | 92           | P3149_fuj26 | 0           | / | 900 | 100          | 254              | 254                | ≥ 95%              |
| F1340_sef-1     | P3126_fuj1  | 0           | / | 900 | 88           | P3156_kan2  | 0           | / | 900 | 89           | 251              | 251                | ≥ 95%              |
| F1341_sef-2     | P3129_fuj5  | 0           | / | 900 | 71           | P3149_fuj26 | 0           | / | 900 | 65           | 219              | 219                | ≥ 95%              |
| F1342_sef-3     | P3134_fuj10 | 0           | / | 900 | 108          | P3126_fuj1  | 0           | / | 900 | 91           | 264              | 264                | ≥ 95%              |
| F1343_sef-4     | P3134_fuj10 | 1           | / | 900 | 102          | P3149_fuj26 | 1           | / | 900 | 84           | 252              | 252                | ≥ 95%              |
| F1344_sef-5     | P3134_fuj10 | 3           | / | 900 | 81           | P3152_fuj29 | 0           | / | 900 | 116          | 270              | 270                | ≥ 95%              |
| F1345_sef-6     | P3134_fuj10 | 1           | / | 900 | 108          | P3162_kar1  | 1           | / | 900 | 102          | 279              | 279                | ≥ 95%              |
| F1346_sef-7     | P3134_fuj10 | 0           | / | 900 | 90           | P3156_kan2  | 0           | / | 900 | 94           | 262              | 262                | ≥ 95%              |
| F1347_sef-8     | P3134_fuj10 | 0           | / | 900 | 106          | P3156_kan2  | 1           | / | 900 | 103          | 287              | 287                | ≥ 95%              |
| F1348_sef-9     | P3134_fuj10 | 1           | / | 900 | 90           | P3156_kan2  | 1           | / | 900 | 94           | 253              | 253                | ≥ 95%              |
| F1349_sef-10    | P3134_fuj10 | 1           | / | 900 | 86           | P3154_ima2  | 0           | / | 900 | 109          | 262              | 262                | ≥ 95%              |
| F1350_sef-11    | P3134_fuj10 | 1           | / | 900 | 82           | P3154_ima2  | 1           | / | 900 | 102          | 247              | 247                | ≥ 95%              |
| F1351_sef-12    | P3134_fuj10 | 1           | / | 900 | 94           | P3154_ima2  | 1           | / | 900 | 95           | 256              | 256                | ≥ 95%              |
| F1352_sef-13    | P3141_fuj17 | 3           | / | 900 | 106          | P3126_fuj1  | 0           | / | 900 | 68           | 257              | 257                | ≥ 95%              |
| F1353_sef-14    | P3168_kar7  | 1           | / | 900 | 95           | P3149_fuj26 | 0           | / | 900 | 118          | 269              | 269                | ≥ 95%              |
| F1354_sef-15    | P3168_kar7  | 1           | / | 900 | 104          | P3149_fuj26 | 1           | / | 900 | 103          | 266              | 212                | ≥ 95%              |
| F1355_sef-16    | P3149_fuj26 | 2           | / | 900 | 51           | P3129_fuj5  | 0           | / | 900 | 89           | 229              | 229                | ≥ 95%              |
| F1357_sef-18    | P3126_fuj1  | 1           | / | 900 | 73           | P3086_yam1  | 1           | / | 900 | 103          | 246              | 246                | ≥ 95%              |
| F1358_sef-19    | P3126_fuj1  | 1           | / | 900 | 72           | P3168_kar7  | 2           | / | 900 | 97           | 252              | 210                | ≥ 95%              |
| F1359_sef-20    | P3126_fuj1  | 0           | / | 900 | 86           | P3086_yam1  | 3           | / | 900 | 114          | 270              | 270                | ≥ 95%              |
| F1361_sef-22    | P3154_ima2  | 0           | / | 900 | 96           | P3127_fuj2  | 1           | / | 900 | 107          | 276              | 276                | ≥ 95%              |
