# Supplementary material for: Genomic Prediction of Tree Height, Wood Stiffness, and Male Flower Quantity Traits across Two Generations in Selected Individuals of Cryptomeria japonica D. Don (Japanese Cedar)
Source: MDPI journal article supplement (doi:10.3390/f14102097), 2023-10-19
Supplement: s1 [file s1]

**Table S6.** Five-fold cross validation test results for the population consisting of G1 and G2.

| Trait                       | Model  | N   | N  |     | CV1  | CV2  | CV3  | CV4  | CV5  | mean | SE   |
|-----------------------------|--------|-----|----|-----|------|------|------|------|------|------|------|
|                             |        |     | G1 | G2  |      |      |      |      |      |      |      |
| <b>Tree height</b>          | BayesA | 142 | 47 | 95  | 0.53 | 0.59 | 0.51 | 0.69 | 0.55 | 0.57 | 0.03 |
|                             | BayesB | 142 | 47 | 95  | 0.51 | 0.52 | 0.54 | 0.64 | 0.72 | 0.59 | 0.04 |
|                             | BayesC | 142 | 47 | 95  | 0.58 | 0.58 | 0.31 | 0.66 | 0.48 | 0.52 | 0.05 |
|                             | BL     | 142 | 47 | 95  | 0.45 | 0.44 | 0.63 | 0.53 | 0.66 | 0.54 | 0.04 |
|                             | BRR    | 142 | 47 | 95  | 0.54 | 0.69 | 0.63 | 0.74 | 0.42 | 0.60 | 0.05 |
| <b>Wood stiffness</b>       | BayesA | 145 | 44 | 101 | 0.57 | 0.55 | 0.58 | 0.59 | 0.57 | 0.57 | 0.01 |
|                             | BayesB | 145 | 44 | 101 | 0.53 | 0.54 | 0.44 | 0.64 | 0.65 | 0.56 | 0.03 |
|                             | BayesC | 145 | 44 | 101 | 0.37 | 0.73 | 0.32 | 0.67 | 0.49 | 0.52 | 0.07 |
|                             | BL     | 145 | 44 | 101 | 0.59 | 0.67 | 0.36 | 0.53 | 0.41 | 0.51 | 0.05 |
|                             | BRR    | 145 | 44 | 101 | 0.61 | 0.35 | 0.40 | 0.52 | 0.61 | 0.50 | 0.05 |
| <b>Male flower quantity</b> | BayesA | 148 | 47 | 101 | 0.58 | 0.25 | 0.56 | 0.54 | 0.36 | 0.46 | 0.06 |
|                             | BayesB | 148 | 47 | 101 | 0.48 | 0.45 | 0.56 | 0.23 | 0.68 | 0.48 | 0.06 |
|                             | BayesC | 148 | 47 | 101 | 0.65 | 0.37 | 0.40 | 0.44 | 0.42 | 0.46 | 0.05 |
|                             | BL     | 148 | 47 | 101 | 0.58 | 0.43 | 0.26 | 0.57 | 0.43 | 0.45 | 0.05 |
|                             | BRR    | 148 | 47 | 101 | 0.41 | 0.27 | 0.43 | 0.48 | 0.65 | 0.45 | 0.05 |

**Table S7.** (a) Five-fold cross validation test results for the population consisting of G1\_parent and G2, (b) Five-fold cross validation test results for the population consisting of G1\_unrelated and G2.**(a)G1\_parent +G2**

| Trait                       | Model  | N   | N  |     | CV1  | CV2  | CV3  | CV4  | CV5  | mean | SE   |
|-----------------------------|--------|-----|----|-----|------|------|------|------|------|------|------|
|                             |        |     | G1 | G2  |      |      |      |      |      |      |      |
| <b>Tree height</b>          | BRR    | 116 | 21 | 95  | 0.68 | 0.41 | 0.32 | 0.32 | 0.48 | 0.44 | 0.06 |
| <b>Wood stiffness</b>       | BayesA | 119 | 18 | 101 | 0.56 | 0.58 | 0.49 | 0.63 | 0.40 | 0.53 | 0.03 |
| <b>Male flower quantity</b> | BayesB | 122 | 21 | 101 | 0.35 | 0.35 | 0.26 | 0.56 | 0.33 | 0.37 | 0.05 |

**(b)G1\_unrelated +G2**

| Trait                       | Model  | N   | N  |     | CV1  | CV2  | CV3  | CV4  | CV5  | mean | SE   |
|-----------------------------|--------|-----|----|-----|------|------|------|------|------|------|------|
|                             |        |     | G1 | G2  |      |      |      |      |      |      |      |
| <b>Tree height</b>          | BRR    | 121 | 26 | 95  | 0.49 | 0.54 | 0.68 | 0.71 | 0.82 | 0.65 | 0.05 |
| <b>Wood stiffness</b>       | BayesA | 127 | 26 | 101 | 0.39 | 0.47 | 0.35 | 0.53 | 0.67 | 0.48 | 0.05 |
| <b>Male flower quantity</b> | BayesB | 127 | 26 | 101 | 0.73 | 0.72 | 0.23 | 0.42 | 0.49 | 0.52 | 0.08 |

G1\_parent: G1 clones with G2 offspring. G1\_unrelated: G1 clones that left no offspring in G2.

For each trait, the model providing the highest accuracy over the full dataset was used (See Table 2).
