# Supplementary material for: Genomic Prediction of Tree Height, Wood Stiffness, and Male Flower Quantity Traits across Two Generations in Selected Individuals of Cryptomeria japonica D. Don (Japanese Cedar)
Source: MDPI journal article supplement (doi:10.3390/f14102097), 2023-10-19
Supplement: s1 [file s1]

(a) Tree height

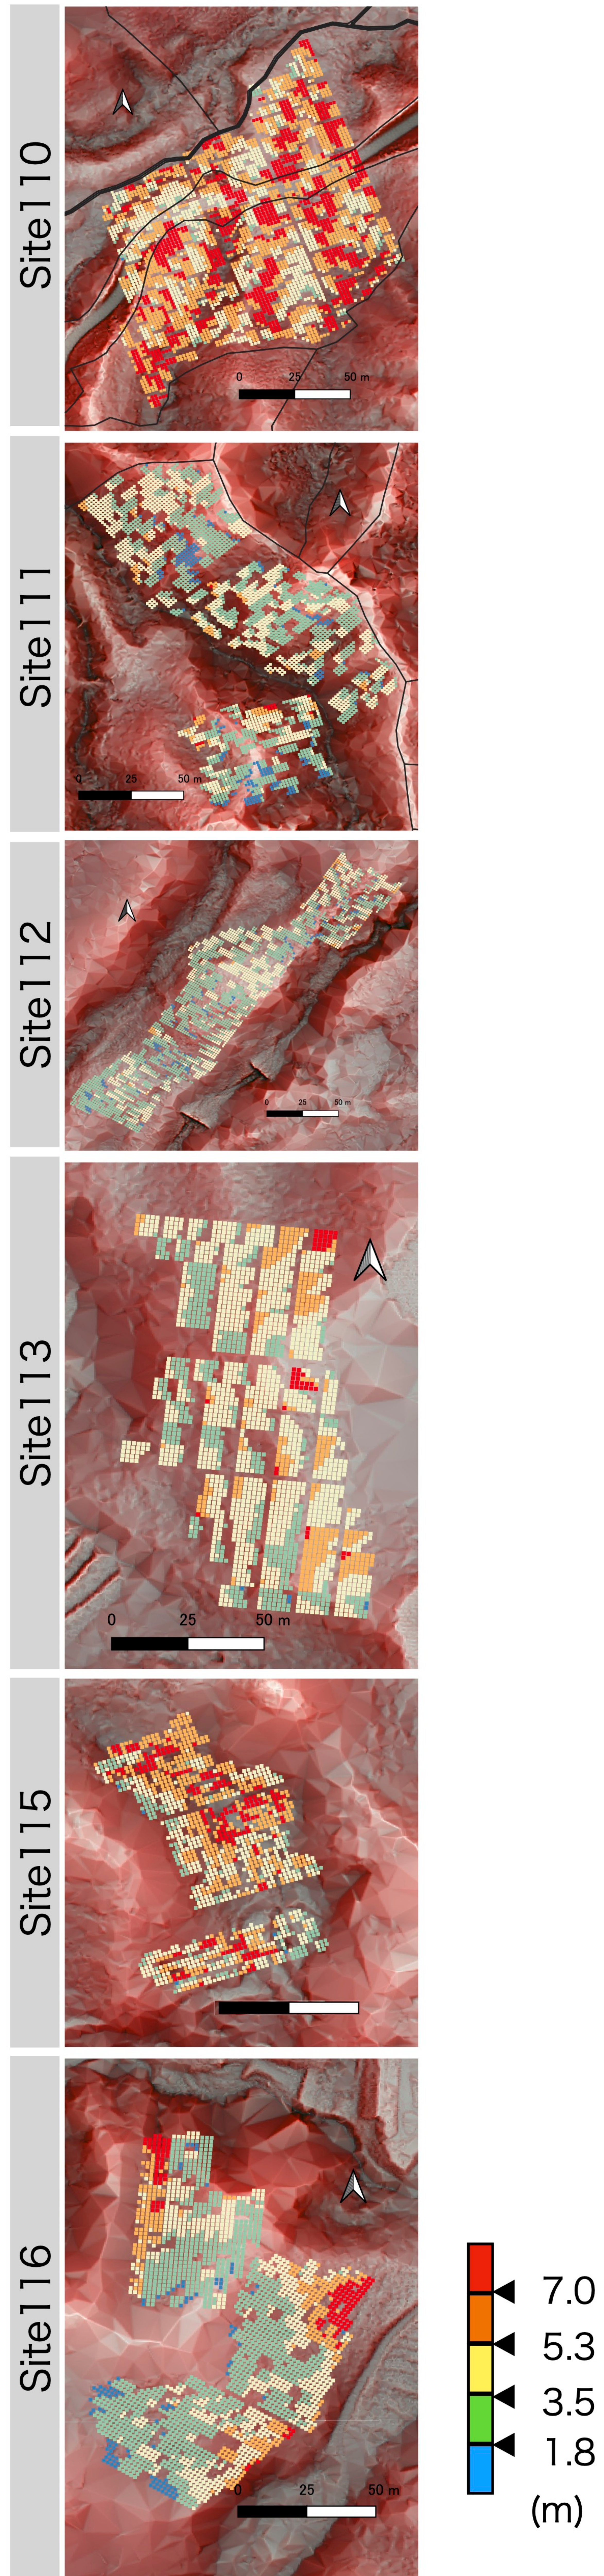

(b) Spatial Autocorrelation residual

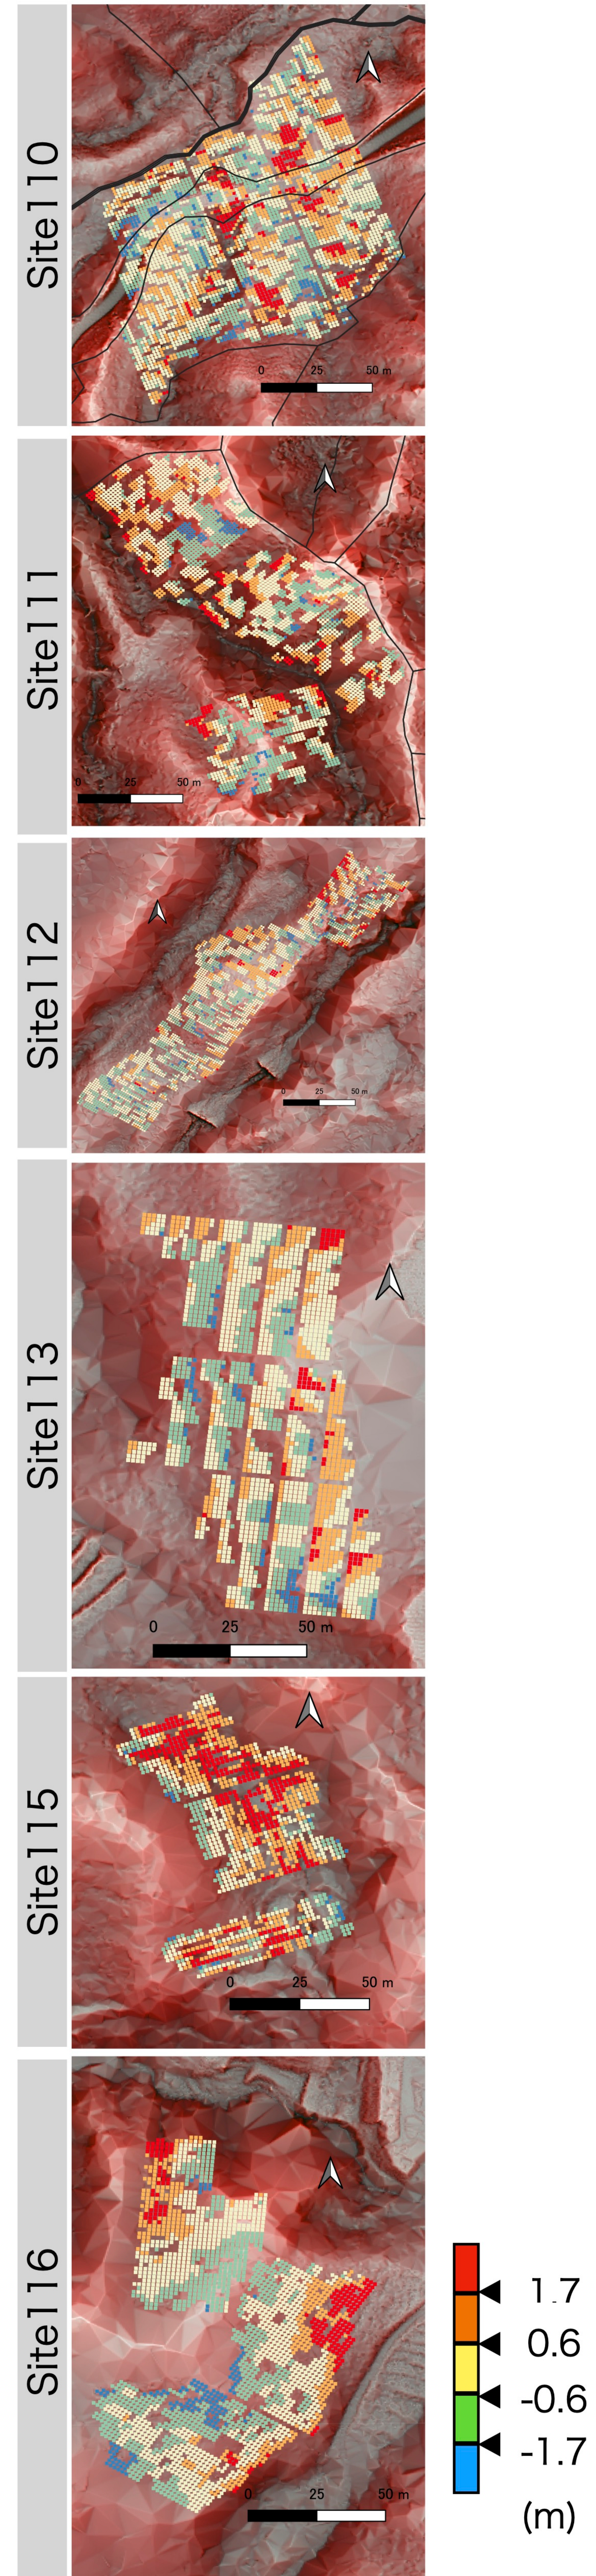

**Figure S1.** (a) Tree height at age 10 years in the clonal test site, (b) Spatial autocorrelation residuals. Background maps are red relief image maps.
