# Supplementary material for: Genomic Prediction of Tree Height, Wood Stiffness, and Male Flower Quantity Traits across Two Generations in Selected Individuals of Cryptomeria japonica D. Don (Japanese Cedar)
Source: MDPI journal article supplement (doi:10.3390/f14102097), 2023-10-19
Supplement: s1 [file s1]

**Table S3.** Numbers of individuals or pieces of lumber and mean wood stiffness measurements for each clone that were used to calculate Clonal values for wood stiffness.

| Generation | Method      |  | Stress-wave of Standing Tree |            |             |            | Dynamic Young's modulus of Lumber (size : 2000mm x 38mm x 89mm) |             |                |                   |                             |             |                   | Equipment | Statistics | Clonal value |                             |
|------------|-------------|--|------------------------------|------------|-------------|------------|-----------------------------------------------------------------|-------------|----------------|-------------------|-----------------------------|-------------|-------------------|-----------|------------|--------------|-----------------------------|
|            | Tree age    |  | 22~29 years                  |            | 30~39 years |            | 30~39 years                                                     |             |                |                   |                             |             |                   |           |            |              |                             |
|            | Equipment   |  | Fakopp                       |            | TreeSonic   |            | FFT Analyser                                                    |             |                |                   |                             |             |                   |           |            |              |                             |
|            | Clone       |  | N of Tree                    | time (μ s) | N of Tree   | time (μ s) | Total                                                           |             | Juvenile point |                   | Mature point                |             |                   |           |            |              |                             |
|            |             |  |                              |            |             |            | N of Tree                                                       | N of Lumber | N of Lumber    | Wide of ring (mm) | Young (kN/mm <sup>2</sup> ) | N of Lumber | Wide of ring (mm) |           |            |              | Young (kN/mm <sup>2</sup> ) |
| G1         | P3122_sag1  |  |                              |            | 3           | 257        | 3                                                               | 7           | 6              | 5.46              | 5.74                        | 1           | 4.33              | 8.43      | FFT        | BLUP         | -0.13                       |
| G1         | P3123_sag2  |  |                              |            | 5           | 292        |                                                                 |             |                |                   |                             |             |                   |           | TreeSonic  | Mean         | -0.18                       |
| G1         | P3124_sag3  |  |                              |            | 15          | 326        | 15                                                              | 50          | 30             | 6.01              | 5.17                        | 20          | 5.39              | 5.85      | FFT        | BLUP         | -0.97                       |
| G1         | P3126_fuj1  |  |                              |            | 8           | 289        | 8                                                               | 21          | 16             | 4.89              | 6.14                        | 5           | 4.04              | 7.48      | FFT        | BLUP         | -0.14                       |
| G1         | P3127_fuj2  |  |                              |            | 4           | 329        | 4                                                               | 9           | 8              | 3.49              | 5.37                        | 1           | 4.38              | 6.17      | FFT        | BLUP         | -1.28                       |
| G1         | P3129_fuj5  |  |                              |            | 12          | 305        | 12                                                              | 46          | 24             | 5.24              | 5.95                        | 22          | 4.71              | 6.75      | FFT        | BLUP         | -0.48                       |
| G1         | P3130_fuj6  |  |                              |            | 4           | 289        |                                                                 |             |                |                   |                             |             |                   |           | TreeSonic  | Mean         | -0.08                       |
| G1         | P3132_fuj8  |  |                              |            | 7           | 274        |                                                                 |             |                |                   |                             |             |                   |           | TreeSonic  | Mean         | 0.41                        |
| G1         | P3133_fuj9  |  |                              |            | 12          | 267        |                                                                 |             |                |                   |                             |             |                   |           | TreeSonic  | Mean         | 0.64                        |
| G1         | P3134_fuj10 |  |                              |            | 16          | 281        | 16                                                              | 70          | 31             | 5.18              | 6.64                        | 39          | 4.90              | 8.61      | FFT        | BLUP         | 0.82                        |
| G1         | P3135_fuj11 |  |                              |            | 5           | 295        |                                                                 |             |                |                   |                             |             |                   |           | TreeSonic  | Mean         | -0.29                       |
| G1         | P3136_fuj12 |  |                              |            | 5           | 283        |                                                                 |             |                |                   |                             |             |                   |           | TreeSonic  | Mean         | 0.10                        |
| G1         | P3138_fuj14 |  |                              |            | 14          | 339        | 14                                                              | 27          | 27             | 4.22              | 4.59                        |             |                   |           | FFT        | BLUP         | -1.82                       |
| G1         | P3139_fuj15 |  |                              |            | 4           | 271        | 4                                                               | 15          | 8              | 5.87              | 5.97                        | 7           | 4.00              | 6.89      | FFT        | BLUP         | -0.38                       |
| G1         | P3140_fuj16 |  |                              |            | 5           | 294        |                                                                 |             |                |                   |                             |             |                   |           | TreeSonic  | Mean         | -0.26                       |
| G1         | P3141_fuj17 |  |                              |            | 5           | 329        | 5                                                               | 13          | 10             | 4.49              | 4.81                        | 3           | 3.57              | 6.35      | FFT        | BLUP         | -1.50                       |
| G1         | P3143_fuj19 |  |                              |            | 7           | 270        |                                                                 |             |                |                   |                             |             |                   |           | TreeSonic  | Mean         | 0.54                        |
| G1         | P3144_fuj20 |  |                              |            | 7           | 314        |                                                                 |             |                |                   |                             |             |                   |           | TreeSonic  | Mean         | -0.91                       |
| G1         | P3145_fuj21 |  |                              |            | 5           | 262        |                                                                 |             |                |                   |                             |             |                   |           | TreeSonic  | Mean         | 0.81                        |
| G1         | P3146_fuj22 |  |                              |            | 7           | 303        |                                                                 |             |                |                   |                             |             |                   |           | TreeSonic  | Mean         | -0.56                       |
| G1         | P3147_fuj24 |  |                              |            | 4           | 306        |                                                                 |             |                |                   |                             |             |                   |           | TreeSonic  | Mean         | -0.64                       |
| G1         | P3148_fuj25 |  |                              |            | 15          | 264        | 15                                                              | 51          | 29             | 4.62              | 7.04                        | 22          | 4.29              | 9.32      | FFT        | BLUP         | 1.07                        |
| G1         | P3149_fuj26 |  |                              |            | 4           | 295        | 4                                                               | 12          | 6              | 5.86              | 5.21                        | 6           | 3.48              | 7.67      | FFT        | BLUP         | -0.49                       |
| G1         | P3150_fuj27 |  |                              |            | 5           | 269        |                                                                 |             |                |                   |                             |             |                   |           | TreeSonic  | Mean         | 0.57                        |
| G1         | P3151_fuj28 |  |                              |            | 2           | 263        | 2                                                               | 7           | 4              | 6.98              | 5.07                        | 3           | 4.23              | 8.35      | FFT        | BLUP         | 0.03                        |
| G1         | P3152_fuj29 |  |                              |            | 8           | 296        | 8                                                               | 25          | 16             | 4.90              | 6.14                        | 9           | 4.18              | 7.90      | FFT        | BLUP         | -0.02                       |
| G1         | P3153_ima1  |  |                              |            | 14          | 284        | 14                                                              | 48          | 28             | 5.71              | 6.48                        | 20          | 4.25              | 8.28      | FFT        | BLUP         | 0.53                        |
| G1         | P3154_ima2  |  |                              |            | 8           | 286        | 8                                                               | 34          | 16             | 5.39              | 5.53                        | 18          | 4.85              | 7.40      | FFT        | BLUP         | -0.31                       |
| G1         | P3155_kan1  |  |                              |            | 7           | 277        | 7                                                               | 29          | 14             | 6.17              | 6.09                        | 15          | 4.35              | 8.05      | FFT        | BLUP         | 0.32                        |
| G1         | P3156_kan2  |  |                              |            | 5           | 285        | 5                                                               | 25          | 10             | 5.68              | 5.75                        | 15          | 4.34              | 8.31      | FFT        | BLUP         | 0.26                        |
| G1         | P3157_kan3  |  |                              |            | 6           | 286        |                                                                 |             |                |                   |                             |             |                   |           | TreeSonic  | Mean         | 0.01                        |
| G1         | P3158_kan4  |  |                              |            | 2           | 295        | 2                                                               | 7           | 4              | 6.24              | 4.98                        | 3           | 5.00              | 6.67      | FFT        | BLUP         | -0.71                       |
| G1         | P3162_kar1  |  |                              |            | 14          | 253        | 14                                                              | 33          | 28             | 4.24              | 8.72                        | 5           | 4.36              | 9.73      | FFT        | BLUP         | 2.18                        |
| G1         | P3163_kar2  |  |                              |            | 5           | 271        |                                                                 |             |                |                   |                             |             |                   |           | TreeSonic  | Mean         | 0.52                        |
| G1         | P3164_kar3  |  |                              |            | 4           | 245        | 4                                                               | 8           | 8              | 4.08              | 7.44                        |             |                   |           | FFT        | BLUP         | 0.83                        |
| G1         | P3165_kar4  |  |                              |            | 4           | 291        | 4                                                               | 15          | 8              | 5.42              | 4.84                        | 7           | 4.01              | 7.21      | FFT        | BLUP         | -0.89                       |
| G1         | P3166_kar5  |  |                              |            | 5           | 282        |                                                                 |             |                |                   |                             |             |                   |           | TreeSonic  | Mean         | 0.14                        |
| G1         | P3167_kar6  |  |                              |            | 9           | 331        | 9                                                               | 21          | 18             | 4.01              | 4.58                        | 3           | 3.74              | 6.07      | FFT        | BLUP         | -1.89                       |
| G1         | P3168_kar7  |  |                              |            | 5           | 295        | 5                                                               | 18          | 10             | 4.19              | 7.83                        | 8           | 4.73              | 8.01      | FFT        | BLUP         | 0.89                        |
| G1         | P3169_kar8  |  |                              |            | 7           | 301        | 7                                                               | 20          | 14             | 4.75              | 4.16                        | 6           | 4.29              | 5.08      | FFT        | BLUP         | -2.20                       |
| G1         | P3170_kar10 |  |                              |            | 4           | 277        | 4                                                               | 13          | 6              | 5.82              | 5.61                        | 7           | 5.92              | 7.14      | FFT        | BLUP         | -0.13                       |
| G1         | P3171_kar11 |  |                              |            | 3           | 296        |                                                                 |             |                |                   |                             |             |                   |           | TreeSonic  | Mean         | -0.31                       |
| G1         | P3172_kis1  |  |                              |            | 8           | 331        | 8                                                               | 21          | 16             | 5.03              | 4.88                        | 5           | 4.72              | 5.66      | FFT        | BLUP         | -1.39                       |
| G1         | P3173_kis2  |  |                              |            | 1           | 280        | 1                                                               | 4           | 2              | 5.40              | 6.07                        | 2           | 5.32              | 8.83      | FFT        | BLUP         | 0.63                        |
| G2         | F1103_A-3   |  | 9                            | 374        |             |            |                                                                 |             |                |                   |                             |             |                   |           | Fakopp     | Mean         | -0.82                       |
| G2         | F1107_A-7   |  | 8                            | 379        |             |            |                                                                 |             |                |                   |                             |             |                   |           | Fakopp     | Mean         | -0.96                       |
| G2         | F1111_A-11  |  | 9                            | 364        |             |            |                                                                 |             |                |                   |                             |             |                   |           | Fakopp     | Mean         | -0.55                       |
| G2         | F1112_A-12  |  | 9                            | 358        | 4           | 277        | 4                                                               | 16          | 8              | 6.53              | 6.43                        | 8           | 5.02              | 7.57      | FFT        | BLUP         | 0.42                        |
| G2         | F1120_A-20  |  | 9                            | 340        | 4           | 278        | 4                                                               | 14          | 8              | 6.95              | 5.86                        | 6           | 4.59              | 7.88      | FFT        | BLUP         | 0.31                        |
| G2         | F1121_A-21  |  | 9                            | 318        | 4           | 250        | 4                                                               | 13          | 8              | 7.41              | 5.42                        | 5           | 4.21              | 8.93      | FFT        | BLUP         | 0.49                        |
| G2         | F1122_A-22  |  | 9                            | 363        |             |            |                                                                 |             |                |                   |                             |             |                   |           | Fakopp     | Mean         | -0.52                       |
| G2         | F1128_A-28  |  | 6                            | 338        |             |            |                                                                 |             |                |                   |                             |             |                   |           | Fakopp     | Mean         | 0.18                        |
| G2         | F1130_A-30  |  | 9                            | 337        |             |            |                                                                 |             |                |                   |                             |             |                   |           | Fakopp     | Mean         | 0.20                        |
| G2         | F1131_A-31  |  | 8                            | 357        |             |            |                                                                 |             |                |                   |                             |             |                   |           | Fakopp     | Mean         | -0.35                       |
| G2         | F1136_A-36  |  | 7                            | 351        |             |            |                                                                 |             |                |                   |                             |             |                   |           | Fakopp     | Mean         | -0.19                       |
| G2         | F1137_A-37  |  | 8                            | 386        | 4           | 298        | 4                                                               | 15          | 8              | 7.58              | 4.68                        | 7           | 4.48              | 5.72      | FFT        | BLUP         | -1.16                       |
| G2         | F1140_A-40  |  | 8                            | 379        | 4           | 287        | 4                                                               | 11          | 8              | 5.39              | 5.22                        | 3           | 3.91              | 6.75      | FFT        | BLUP         | -0.85                       |
| G2         | F1141_A-41  |  | 7                            | 358        |             |            |                                                                 |             |                |                   |                             |             |                   |           | Fakopp     | Mean         | -0.38                       |
| G2         | F1148_A-48  |  | 8                            | 347        | 3           | 282        | 3                                                               | 9           | 6              | 5.44              | 5.73                        | 3           | 7.43              | 5.47      | FFT        | BLUP         | -0.52                       |
| G2         | F1149_A-49  |  | 9                            | 374        |             |            |                                                                 |             |                |                   |                             |             |                   |           | Fakopp     | Mean         | -0.82                       |
| G2         | F1163_A-63  |  | 9                            | 366        |             |            |                                                                 |             |                |                   |                             |             |                   |           | Fakopp     | Mean         | -0.60                       |
| G2         | F1166_A-66  |  | 9                            | 330        | 4           | 269        | 4                                                               | 11          | 8              | 6.01              | 6.85                        | 3           | 3.91              | 8.76      | FFT        | BLUP         | 0.92                        |
| G2         | F1171_A-71  |  | 9                            | 369        | 3           | 298        | 3                                                               | 12          | 6              | 7.03              | 5.24                        | 6           | 4.28              | 7.54      | FFT        | BLUP         | -0.17                       |
| G2         | F1172_A-72  |  | 7                            | 329        |             |            |                                                                 |             |                |                   |                             |             |                   |           | Fakopp     | Mean         | 0.43                        |
| G2         | F1176_A-76  |  | 9                            | 354        |             |            |                                                                 |             |                |                   |                             |             |                   |           | Fakopp     | Mean         | -0.27                       |
| G2         | F1210_B-10  |  | 6                            | 348        | 4           | 282        | 4                                                               | 12          | 8              | 6.27              | 6.11                        | 4           | 4.33              | 7.00      | FFT        | BLUP         | 0.01                        |
| G2         | F1214_B-14  |  | 9                            | 322        | 4           | 257        | 4                                                               | 10          | 8              | 4.89              | 6.78                        | 2           | 3.31              | 8.79      | FFT        | BLUP         | 0.54                        |
| G2         | F1216_B-16  |  | 5                            | 318        | 2           | 281        | 2                                                               | 8           | 4              | 6.06              | 6.30                        | 4           | 5.10              | 8.08      | FFT        | BLUP         | 0.51                        |
| G2         | F1218_B-18  |  | 9                            | 358        | 4           | 304        | 4                                                               | 16          | 8              | 6.67              | 5.21                        | 8           | 4.48              | 5.93      | FFT        | BLUP         | -1.01                       |
| G2         | F1220_B-20  |  | 9                            | 346        | 8           | 301        | 8                                                               | 32          | 16             | 6.83              | 5.57                        | 16          | 4.70              | 6.68      | FFT        | BLUP         | -0.42                       |

**Table S3.** Numbers of individuals or pieces of lumber and mean wood stiffness measurements for each clone that were used to calculate Clonal values for wood stiffness.

| Generation | Method          |  | Stress-wave of Standing Tree |                    |             |                    | Dynamic Young's modulus of Lumber (size : 2000mm x 38mm x 89mm) |             |                |                      |                                |              |                      |                                | Equipment | Statistics | Clonal value |
|------------|-----------------|--|------------------------------|--------------------|-------------|--------------------|-----------------------------------------------------------------|-------------|----------------|----------------------|--------------------------------|--------------|----------------------|--------------------------------|-----------|------------|--------------|
|            | Tree age        |  | 22~29 years                  |                    | 30~39 years |                    | 30~39 years                                                     |             |                |                      |                                |              |                      |                                |           |            |              |
|            | Equipment       |  | Fakopp                       |                    | TreeSonic   |                    | FFT Analyser                                                    |             |                |                      |                                |              |                      |                                |           |            |              |
|            | Clone           |  | N of Tree                    | time<br>( $\mu$ s) | N of Tree   | time<br>( $\mu$ s) | Total                                                           |             | Juvenile point |                      |                                | Mature point |                      |                                |           |            |              |
|            |                 |  |                              |                    |             |                    | N of Tree                                                       | N of Lumber | N of Lumber    | Wide of ring<br>(mm) | Young<br>(kN/mm <sup>2</sup> ) | N of Lumber  | Wide of ring<br>(mm) | Young<br>(kN/mm <sup>2</sup> ) |           |            |              |
| G2         | F1221_B-21      |  | 9                            | 345                |             |                    | 4                                                               | 13          | 8              | 4.90                 | 7.23                           | 5            | 4.05                 | 8.22                           | Fakopp    | Mean       | -0.02        |
| G2         | F1222_B-22      |  | 9                            | 324                | 4           | 264                | 4                                                               |             | 8              |                      |                                |              |                      |                                | FFT       | BLUP       | 0.72         |
| G2         | F1226_B-26      |  | 9                            | 374                |             |                    |                                                                 |             |                |                      |                                |              |                      |                                | Fakopp    | Mean       | -0.82        |
| G2         | F1227_B-27      |  | 9                            | 352                | 4           | 283                | 4                                                               | 9           | 8              | 5.57                 | 5.57                           | 1            | 4.71                 | 5.51                           | FFT       | BLUP       | -0.55        |
| G2         | F1229_B-29      |  | 9                            | 329                |             |                    |                                                                 |             |                |                      |                                |              |                      |                                | Fakopp    | Mean       | 0.43         |
| G2         | F1230_B-30      |  | 7                            | 370                |             |                    |                                                                 |             |                |                      |                                |              |                      |                                | Fakopp    | Mean       | -0.71        |
| G2         | F1238_B-38      |  | 7                            | 342                |             |                    |                                                                 |             |                |                      |                                |              |                      |                                | Fakopp    | Mean       | 0.06         |
| G2         | F1240_B-40      |  | 9                            | 357                | 4           | 321                | 4                                                               | 18          | 8              | 6.55                 | 5.17                           | 10           | 5.57                 | 6.08                           | FFT       | BLUP       | -0.84        |
| G2         | F1250_B-50      |  | 9                            | 347                |             |                    |                                                                 |             |                |                      |                                |              |                      |                                | Fakopp    | Mean       | -0.07        |
| G2         | F1254_B-54      |  | 17                           | 351                | 8           | 279                | 8                                                               | 29          | 16             | 6.10                 | 7.87                           | 13           | 4.42                 | 8.90                           | FFT       | BLUP       | 1.64         |
| G2         | F1255_B-55      |  | 9                            | 350                |             |                    |                                                                 |             |                |                      |                                |              |                      |                                | Fakopp    | Mean       | -0.16        |
| G2         | F1256_B-56      |  | 9                            | 317                | 4           | 273                | 4                                                               | 16          | 8              | 6.10                 | 5.79                           | 8            | 4.22                 | 8.43                           | FFT       | BLUP       | 0.31         |
| G2         | F1259_B-59      |  | 9                            | 344                | 4           | 293                | 4                                                               | 18          | 8              | 7.10                 | 7.52                           | 10           | 4.93                 | 7.39                           | FFT       | BLUP       | 0.83         |
| G2         | F1261_B-61      |  | 9                            | 321                | 4           | 291                | 4                                                               | 17          | 8              | 5.80                 | 6.24                           | 9            | 4.96                 | 8.21                           | FFT       | BLUP       | 0.50         |
| G2         | F1265_B-65      |  | 8                            | 349                | 6           | 306                | 6                                                               | 27          | 12             | 6.57                 | 7.03                           | 15           | 5.99                 | 6.99                           | FFT       | BLUP       | 0.53         |
| G2         | F1274_B-74      |  | 9                            | 323                | 16          | 278                | 16                                                              | 63          | 32             | 7.57                 | 6.69                           | 31           | 4.53                 | 9.05                           | FFT       | BLUP       | 1.40         |
| G2         | F1275_B-75      |  | 9                            | 333                |             |                    |                                                                 |             |                |                      |                                |              |                      |                                | Fakopp    | Mean       | 0.31         |
| G2         | F1282_B-82      |  | 7                            | 342                | 3           | 275                | 3                                                               | 7           | 6              | 5.32                 | 8.16                           | 1            | 3.45                 | 10.61                          | FFT       | BLUP       | 1.95         |
| G2         | F1293_B-93      |  | 9                            | 339                | 4           | 262                | 4                                                               | 14          | 8              | 7.22                 | 6.09                           | 6            | 4.22                 | 8.61                           | FFT       | BLUP       | 0.72         |
| G2         | F1294_B-94      |  | 9                            | 341                | 7           | 289                | 7                                                               | 24          | 14             | 6.08                 | 5.86                           | 10           | 4.19                 | 7.51                           | FFT       | BLUP       | -0.08        |
| G2         | F1303_ima_33-11 |  |                              |                    | 7           | 309                |                                                                 |             |                |                      |                                |              |                      |                                | TreeSonic | Mean       | -0.76        |
| G2         | F1304_ima_24-5  |  |                              |                    | 6           | 286                |                                                                 |             |                |                      |                                |              |                      |                                | TreeSonic | Mean       | 0.02         |
| G2         | F1306_oom_05-06 |  | 9                            | 353                |             |                    |                                                                 |             |                |                      |                                |              |                      |                                | Fakopp    | Mean       | -0.25        |
| G2         | F1307_oom_07-07 |  | 9                            | 389                |             |                    |                                                                 |             |                |                      |                                |              |                      |                                | Fakopp    | Mean       | -1.23        |
| G2         | F1308_oom_31-03 |  | 9                            | 405                |             |                    |                                                                 |             |                |                      |                                |              |                      |                                | Fakopp    | Mean       | -1.67        |
| G2         | F1309_oom_24-12 |  | 9                            | 390                |             |                    |                                                                 |             |                |                      |                                |              |                      |                                | Fakopp    | Mean       | -1.26        |
| G2         | F1310_oom_20-04 |  | 9                            | 402                |             |                    |                                                                 |             |                |                      |                                |              |                      |                                | Fakopp    | Mean       | -1.60        |
| G2         | F1312_oom_05-08 |  | 9                            | 418                |             |                    |                                                                 |             |                |                      |                                |              |                      |                                | Fakopp    | Mean       | -2.04        |
| G2         | F1313_oom_05-03 |  | 9                            | 385                |             |                    |                                                                 |             |                |                      |                                |              |                      |                                | Fakopp    | Mean       | -1.14        |
| G2         | F1314_oom_08-04 |  | 9                            | 378                |             |                    |                                                                 |             |                |                      |                                |              |                      |                                | Fakopp    | Mean       | -0.92        |
| G2         | F1315_tar_11-01 |  | 9                            | 342                |             |                    |                                                                 |             |                |                      |                                |              |                      |                                | Fakopp    | Mean       | 0.06         |
| G2         | F1316_tar_11-03 |  | 9                            | 375                |             |                    |                                                                 |             |                |                      |                                |              |                      |                                | Fakopp    | Mean       | -0.86        |
| G2         | F1317_tar_08-12 |  | 9                            | 352                |             |                    |                                                                 |             |                |                      |                                |              |                      |                                | Fakopp    | Mean       | -0.21        |
| G2         | F1318_tar_10-01 |  | 9                            | 395                |             |                    |                                                                 |             |                |                      |                                |              |                      |                                | Fakopp    | Mean       | -1.40        |
| G2         | F1319_tar_08-06 |  | 9                            | 357                |             |                    |                                                                 |             |                |                      |                                |              |                      |                                | Fakopp    | Mean       | -0.34        |
| G2         | F1320_tar_08-02 |  | 9                            | 357                |             |                    |                                                                 |             |                |                      |                                |              |                      |                                | Fakopp    | Mean       | -0.34        |
| G2         | F1321_tar_13-10 |  | 9                            | 358                |             |                    |                                                                 |             |                |                      |                                |              |                      |                                | Fakopp    | Mean       | -0.39        |
| G2         | F1322_tar_10-07 |  | 9                            | 352                |             |                    |                                                                 |             |                |                      |                                |              |                      |                                | Fakopp    | Mean       | -0.21        |
| G2         | F1323_tar_08-09 |  | 9                            | 386                |             |                    |                                                                 |             |                |                      |                                |              |                      |                                | Fakopp    | Mean       | -1.16        |
| G2         | F1324_tar_08-11 |  | 9                            | 388                |             |                    |                                                                 |             |                |                      |                                |              |                      |                                | Fakopp    | Mean       | -1.20        |
| G2         | F1325_tar_10-06 |  | 9                            | 375                |             |                    |                                                                 |             |                |                      |                                |              |                      |                                | Fakopp    | Mean       | -0.85        |
| G2         | F1326_ima-1     |  | 9                            | 357                |             |                    |                                                                 |             |                |                      |                                |              |                      |                                | Fakopp    | Mean       | -0.35        |
| G2         | F1327_ima-2     |  | 9                            | 338                | 4           | 298                | 4                                                               | 18          | 8              | 5.45                 | 4.86                           | 10           | 3.62                 | 7.83                           | FFT       | BLUP       | -0.59        |
| G2         | F1328_ima-3     |  | 3                            | 361                |             |                    |                                                                 |             |                |                      |                                |              |                      |                                | Fakopp    | Mean       | -0.46        |
| G2         | F1329_ima-4     |  | 4                            | 409                |             |                    |                                                                 |             |                |                      |                                |              |                      |                                | Fakopp    | Mean       | -1.80        |
| G2         | F1330_ima-5     |  | 7                            | 348                |             |                    |                                                                 |             |                |                      |                                |              |                      |                                | Fakopp    | Mean       | -0.10        |
| G2         | F1331_ima-6     |  | 9                            | 388                | 5           | 311                | 5                                                               | 24          | 10             | 7.44                 | 3.80                           | 14           | 4.38                 | 6.06                           | FFT       | BLUP       | -1.55        |
| G2         | F1332_ima-7     |  | 9                            | 318                | 4           | 284                | 4                                                               | 18          | 8              | 6.35                 | 5.70                           | 10           | 4.41                 | 8.55                           | FFT       | BLUP       | 0.45         |
| G2         | F1333_ima-8     |  | 9                            | 354                | 3           | 288                | 3                                                               | 12          | 6              | 8.26                 | 3.26                           | 6            | 4.15                 | 5.73                           | FFT       | BLUP       | -1.79        |
| G2         | F1334_ima-9     |  | 7                            | 312                |             |                    |                                                                 |             |                |                      |                                |              |                      |                                | Fakopp    | Mean       | 0.90         |
| G2         | F1335_ima-10    |  | 8                            | 337                | 4           | 280                | 4                                                               | 17          | 8              | 4.91                 | 5.55                           | 9            | 3.96                 | 7.81                           | FFT       | BLUP       | -0.34        |
| G2         | F1336_ima-11    |  | 9                            | 323                | 4           | 264                | 4                                                               | 17          | 8              | 8.49                 | 4.87                           | 9            | 4.52                 | 9.86                           | FFT       | BLUP       | 1.09         |
| G2         | F1337_ima-12    |  | 9                            | 324                | 4           | 265                | 4                                                               | 15          | 8              | 5.80                 | 5.55                           | 7            | 3.44                 | 9.06                           | FFT       | BLUP       | 0.27         |
| G2         | F1338_ima-13    |  | 2                            | 326                |             |                    |                                                                 |             |                |                      |                                |              |                      |                                | Fakopp    | Mean       | 0.51         |
| G2         | F1339_ima-14    |  | 2                            | 336                |             |                    |                                                                 |             |                |                      |                                |              |                      |                                | Fakopp    | Mean       | 0.23         |
| G2         | F1340_sef-1     |  | 9                            | 303                | 3           | 257                | 3                                                               | 12          | 6              | 6.01                 | 6.21                           | 6            | 2.81                 | 10.89                          | FFT       | BLUP       | 1.41         |
| G2         | F1341_sef-2     |  | 9                            | 321                |             |                    |                                                                 |             |                |                      |                                |              |                      |                                | Fakopp    | Mean       | 0.65         |
| G2         | F1342_sef-3     |  | 7                            | 340                | 3           | 302                | 3                                                               | 18          | 6              | 9.53                 | 4.73                           | 12           | 5.53                 | 6.62                           | FFT       | BLUP       | -0.37        |
| G2         | F1343_sef-4     |  | 9                            | 328                | 3           | 294                | 3                                                               | 17          | 6              | 7.23                 | 5.12                           | 11           | 4.60                 | 8.49                           | FFT       | BLUP       | 0.44         |
| G2         | F1344_sef-5     |  | 9                            | 341                | 4           | 283                | 4                                                               | 14          | 8              | 6.61                 | 4.47                           | 6            | 2.91                 | 8.17                           | FFT       | BLUP       | -0.65        |
| G2         | F1345_sef-6     |  | 4                            | 326                | 1           | 269                | 1                                                               | 6           | 2              | 7.79                 | 5.29                           | 4            | 4.74                 | 8.66                           | FFT       | BLUP       | 0.67         |
| G2         | F1346_sef-7     |  | 5                            | 308                | 3           | 257                | 3                                                               | 14          | 6              | 6.36                 | 7.58                           | 8            | 4.75                 | 10.83                          | FFT       | BLUP       | 2.52         |
| G2         | F1347_sef-8     |  | 3                            | 337                | 1           | 309                | 1                                                               | 4           | 2              | 5.04                 | 7.17                           | 2            | 4.27                 | 9.04                           | FFT       | BLUP       | 0.96         |
| G2         | F1348_sef-9     |  | 9                            | 297                | 5           | 266                | 5                                                               | 22          | 10             | 5.61                 | 6.54                           | 12           | 4.26                 | 9.34                           | FFT       | BLUP       | 1.08         |
| G2         | F1349_sef-10    |  | 9                            | 359                | 4           | 280                | 4                                                               | 18          | 8              | 7.41                 | 3.41                           | 10           | 3.67                 | 7.93                           | FFT       | BLUP       | -0.84        |
| G2         | F1350_sef-11    |  | 9                            | 316                | 4           | 281                | 4                                                               | 24          | 8              | 7.24                 | 5.44                           | 16           | 5.51                 | 7.95                           | FFT       | BLUP       | 0.44         |
| G2         | F1351_sef-12    |  | 9                            | 332                | 4           | 288                | 4                                                               | 19          | 8              | 5.78                 | 4.44                           | 11           | 4.58                 | 7.84                           | FFT       | BLUP       | -0.48        |
| G2         | F1352_sef-13    |  | 8                            | 344                |             |                    |                                                                 |             |                |                      |                                |              |                      |                                | Fakopp    | Mean       | 0.01         |
| G2         | F1353_sef-14    |  | 9                            | 345                |             |                    |                                                                 |             |                |                      |                                |              |                      |                                | Fakopp    | Mean       | -0.02        |
| G2         | F1354_sef-15    |  | 9                            | 329                | 4           | 290                | 4                                                               | 18          | 8              | 6.83                 | 6.17                           | 10           | 3.76                 | 7.96                           | FFT       | BLUP       | 0.27         |

**Table S3.** Numbers of individuals or pieces of lumber and mean wood stiffness measurements for each clone that were used to calculate Clonal values for wood stiffness.

| Generation | Method         |     | Stress-wave of Standing Tree |                    |             |                    | Dynamic Young's modulus of Lumber (size : 2000mm x 38mm x 89mm) |             |                |                      |                                |              |                      |                                | Equipment | Statistics | Clonal value |
|------------|----------------|-----|------------------------------|--------------------|-------------|--------------------|-----------------------------------------------------------------|-------------|----------------|----------------------|--------------------------------|--------------|----------------------|--------------------------------|-----------|------------|--------------|
|            | Tree age       |     | 22~29 years                  |                    | 30~39 years |                    | 30~39 years                                                     |             |                |                      |                                |              |                      |                                |           |            |              |
|            | Equipment      |     | Fakopp                       |                    | TreeSonic   |                    | FFT Analyser                                                    |             |                |                      |                                |              |                      |                                |           |            |              |
|            | Clone          |     | N of Tree                    | time<br>( $\mu$ s) | N of Tree   | time<br>( $\mu$ s) | Total                                                           |             | Juvenile point |                      |                                | Mature point |                      |                                |           |            |              |
|            |                |     |                              |                    |             |                    | N of Tree                                                       | N of Lumber | N of Lumber    | Wide of ring<br>(mm) | Young<br>(kN/mm <sup>2</sup> ) | N of Lumber  | Wide of ring<br>(mm) | Young<br>(kN/mm <sup>2</sup> ) |           |            |              |
| G2         | F1355_sef-16   |     | 8                            | 352                | 3           | 298                | 3                                                               | 10          | 6              | 6.47                 | 4.52                           | 4            | 3.66                 | 6.75                           | FFT       | BLUP       | -1.09        |
| G2         | F1357_sef-18   |     | 4                            | 343                |             |                    |                                                                 |             |                |                      |                                |              |                      |                                | Fakopp    | Mean       | 0.04         |
| G2         | F1358_sef-19   |     | 9                            | 340                | 1           | 296                | 1                                                               | 3           | 2              | 5.59                 | 4.75                           | 1            | 4.40                 | 5.61                           | FFT       | BLUP       | -1.20        |
| G2         | F1359_sef-20   |     | 5                            | 356                |             |                    |                                                                 |             |                |                      |                                |              |                      |                                | Fakopp    | Mean       | -0.32        |
| G2         | F1361_sef-22   |     | 2                            | 324                |             |                    |                                                                 |             |                |                      |                                |              |                      |                                | Fakopp    | Mean       | 0.56         |
| G1         | subtotal       |     |                              |                    | 299         | 289                | 202                                                             | 649         | 397            | 5.16                 | 5.81                           | 252          | 4.46                 | 7.45                           |           |            | -0.15        |
|            | FFT            | 27  |                              |                    | 202         | 292                | 202                                                             | 649         | 397            | 5.16                 | 5.81                           | 252          | 4.13                 | 6.90                           |           |            |              |
|            | Fakopp only    |     |                              |                    |             |                    |                                                                 |             |                |                      |                                |              |                      |                                |           |            |              |
|            | TreeSonic only | 17  |                              |                    | 97          | 285                |                                                                 |             |                |                      |                                |              |                      |                                |           |            |              |
| G2         | subtotal       |     | 806                          | 350                | 204         | 284                | 191                                                             | 754         | 382            | 6.48                 | 5.74                           | 372          | 4.41                 | 7.86                           |           |            | -0.16        |
|            | FFT            | 46  | 390                          | 338                | 191         | 283                | 191                                                             | 754         | 382            | 6.48                 | 5.74                           | 372          | 4.41                 | 7.86                           |           |            |              |
|            | Fakopp only    | 53  | 416                          | 360                |             |                    |                                                                 |             |                |                      |                                |              |                      |                                |           |            |              |
|            | TreeSonic only | 2   |                              |                    | 13          | 298                |                                                                 |             |                |                      |                                |              |                      |                                |           |            |              |
|            | Total          | 145 | 806                          |                    | 503         |                    | 393                                                             | 1,403       | 779            | 5.99                 | 5.77                           | 624          | 4.43                 | 7.72                           |           |            | -0.16        |

The statistics column shows the method used to calculate the Clonal value. BLUP denotes Best Linear Unbiased Prediction. The Mean Stress-wave times of the clones measured using Fakopp or TreeSonic instruments in standing trees were converted into Clonal value using a linear model relating the stress wave times to the Clonal values obtained using BLUP and data from the lumber survey (see details in Supplementary Materials S2)
