# Supplementary material for: Genomic Prediction of Tree Height, Wood Stiffness, and Male Flower Quantity Traits across Two Generations in Selected Individuals of Cryptomeria japonica D. Don (Japanese Cedar)
Source: MDPI journal article supplement (doi:10.3390/f14102097), 2023-10-19
Supplement: s1 [file s1]

Archive with 9 entries (9 files):
- Figure_S1.pdf
- Figure_S2.pdf
- Supplementary_S1-S3.pdf
- Table_S1.pdf
- Table_S2.pdf
- Table_S3.pdf
- Table_S4.pdf
- Table_S5.pdf
- Table_S6-7.pdf
