# Supplementary material for: Genomic Prediction of Tree Height, Wood Stiffness, and Male Flower Quantity Traits across Two Generations in Selected Individuals of Cryptomeria japonica D. Don (Japanese Cedar)
Source: MDPI journal article supplement (doi:10.3390/f14102097), 2023-10-19
Supplement: s1 [file s1 › Table_S2.pdf]

**Table S2.** Numbers of individuals and mean tree heights (measured at 10 years of age in the 6 clonal test sites) that were used to calculate Clonal values for tree height.

| Generation | Clone       | Site | Site_110 |      | Site_111 |      | Site_112 |      | Site_113 |      | Site_115 |      | Site_116 |      | Total |      | Published<br>score | statistics | Clonal<br>value |
|------------|-------------|------|----------|------|----------|------|----------|------|----------|------|----------|------|----------|------|-------|------|--------------------|------------|-----------------|
|            |             | N    | N        | Mean | N     | Mean |                    |            |                 |
| G1         | P3122_sag1  | 4    | 42       | 6.8  |          |      | 61       | 3.3  |          |      | 28       | 4.3  | 90       | 3.2  | 221   | 4.1  | 3                  | BLUP       | -0.76           |
| G1         | P3123_sag2  | 3    | 31       | 5.0  |          |      | 41       | 2.8  | 51       | 3.6  |          |      |          |      | 123   | 3.7  | 2                  | BLUP       | -1.19           |
| G1         | P3124_sag3  | 4    | 23       | 7.3  |          |      |          |      | 74       | 4.8  | 33       | 6.7  | 121      | 4.2  | 251   | 5.0  | 4                  | BLUP       | 0.30            |
| G1         | P3126_fuj1  | 3    | 45       | 6.6  |          |      | 43       | 4.5  | 98       | 4.9  |          |      |          |      | 186   | 5.2  | 4                  | BLUP       | 0.61            |
| G1         | P3127_fuj2  | 4    | 79       | 5.0  |          |      | 47       | 3.9  | 96       | 4.0  |          |      | 95       | 3.2  | 317   | 4.0  | 3                  | BLUP       | -0.92           |
| G1         | P3129_fuj5  | 5    | 84       | 6.8  |          |      | 124      | 3.7  | 96       | 4.9  | 27       | 6.0  | 26       | 5.4  | 357   | 5.1  | 3                  | BLUP       | 0.12            |
| G1         | P3130_fuj6  | 3    | 40       | 4.7  | 63       | 3.2  | 37       | 3.2  |          |      |          |      |          |      | 140   | 3.6  | 2                  | BLUP       | -1.10           |
| G1         | P3132_fuj8  | 1    |          |      | 46       | 2.3  |          |      |          |      |          |      |          |      | 46    | 2.3  | 4                  | BLUP       | -1.94           |
| G1         | P3133_fuj9  | 1    |          |      | 94       | 3.4  |          |      |          |      |          |      |          |      | 94    | 3.4  | 3                  | BLUP       | -1.18           |
| G1         | P3134_fuj10 | 6    | 86       | 5.9  | 84       | 3.4  | 50       | 3.4  | 87       | 4.2  | 31       | 5.1  | 35       | 4.9  | 373   | 4.5  | 3                  | BLUP       | -0.21           |
| G1         | P3135_fuj11 | 4    | 79       | 5.3  | 76       | 3.7  | 66       | 3.1  | 38       | 3.9  |          |      |          |      | 259   | 4.1  | 2                  | BLUP       | -0.74           |
| G1         | P3136_fuj12 | 6    | 49       | 5.6  | 63       | 3.9  | 32       | 3.8  | 68       | 4.3  | 26       | 5.8  | 50       | 3.9  | 288   | 4.4  | 4                  | BLUP       | -0.11           |
| G1         | P3138_fuj14 | 6    | 114      | 5.4  | 110      | 3.8  | 157      | 3.2  | 91       | 3.4  | 24       | 4.8  | 239      | 2.8  | 735   | 3.6  | 2                  | BLUP       | -1.03           |
| G1         | P3139_fuj15 | 2    | 41       | 5.4  | 61       | 2.4  |          |      |          |      |          |      |          |      | 102   | 3.6  | 2                  | BLUP       | -0.48           |
| G1         | P3140_fuj16 | 4    | 63       | 5.8  | 73       | 2.4  | 65       | 3.0  |          |      | 29       | 4.5  |          |      | 230   | 3.7  | 2                  | BLUP       | -0.77           |
| G1         | P3141_fuj17 | 5    | 181      | 5.5  | 140      | 2.7  | 205      | 3.3  | 81       | 5.7  | 25       | 5.1  |          |      | 632   | 4.2  | 3                  | BLUP       | -0.78           |
| G1         | P3143_fuj19 | 5    | 48       | 5.0  | 72       | 2.7  | 37       | 3.2  | 90       | 4.4  | 16       | 5.1  |          |      | 263   | 3.9  | 3                  | BLUP       | -0.97           |
| G1         | P3144_fuj20 | 6    | 57       | 5.4  | 62       | 2.4  | 56       | 2.2  | 39       | 3.9  | 23       | 4.5  | 47       | 2.8  | 284   | 3.4  | 2                  | BLUP       | -1.49           |
| G1         | P3145_fuj21 | 4    | 57       | 4.7  | 48       | 3.6  | 40       | 3.3  |          |      | 28       | 4.3  |          |      | 173   | 4.0  | 2                  | BLUP       | -0.90           |
| G1         | P3146_fuj22 | 4    | 31       | 5.1  | 64       | 2.5  | 65       | 3.7  |          |      |          |      | 23       | 2.5  | 183   | 3.4  | 3                  | BLUP       | -0.91           |
| G1         | P3147_fuj24 | 5    | 86       | 5.1  | 83       | 3.8  | 68       | 3.9  | 81       | 3.9  |          |      | 48       | 2.9  | 366   | 4.0  | 3                  | BLUP       | -0.76           |
| G1         | P3148_fuj25 | 6    | 73       | 5.9  | 86       | 4.8  | 131      | 3.8  | 98       | 3.8  | 23       | 5.6  | 39       | 4.5  | 450   | 4.5  | 3                  | BLUP       | -0.33           |
| G1         | P3149_fuj26 | 4    | 50       | 5.8  | 55       | 3.3  | 23       | 2.8  |          |      | 29       | 5.6  |          |      | 157   | 4.4  | 3                  | BLUP       | -0.55           |
| G1         | P3150_fuj27 | 3    | 63       | 5.1  | 58       | 2.6  | 94       | 3.0  |          |      |          |      |          |      | 215   | 3.5  | 2                  | BLUP       | -1.26           |
| G1         | P3151_fuj28 | 5    | 34       | 6.3  | 63       | 3.9  | 41       | 3.5  | 91       | 4.6  | 29       | 5.0  |          |      | 258   | 4.5  | 3                  | BLUP       | -0.42           |
| G1         | P3152_fuj29 | 4    | 44       | 5.5  |          |      | 106      | 3.8  | 91       | 5.0  | 15       | 4.6  |          |      | 256   | 4.6  | 3                  | BLUP       | -0.18           |
| G1         | P3153_ima1  | 5    | 51       | 7.4  | 60       | 4.2  |          |      | 63       | 5.4  | 26       | 7.2  | 60       | 4.4  | 260   | 5.5  | 5                  | BLUP       | 0.37            |
| G1         | P3154_ima2  | 5    | 52       | 5.4  | 65       | 3.7  |          |      | 104      | 4.3  | 33       | 5.5  | 87       | 3.2  | 341   | 4.2  | 3                  | BLUP       | -0.44           |
| G1         | P3155_kan1  | 4    | 45       | 5.9  |          |      | 61       | 3.5  |          |      | 33       | 5.6  | 15       | 3.3  | 154   | 4.6  | 3                  | BLUP       | -0.38           |
| G1         | P3156_kan2  | 4    | 44       | 7.3  |          |      | 78       | 3.8  |          |      | 28       | 5.2  | 105      | 3.5  | 255   | 4.4  | 3                  | BLUP       | -0.31           |
| G1         | P3157_kan3  | 3    | 23       | 5.3  |          |      | 71       | 2.9  |          |      | 30       | 6.5  |          |      | 124   | 4.2  | 3                  | BLUP       | -0.48           |
| G1         | P3158_kan4  | 2    |          |      |          |      | 19       | 3.7  |          |      | 28       | 4.3  |          |      | 47    | 4.1  | 2                  | BLUP       | -0.12           |
| G1         | P3162_kar1  | 5    | 65       | 5.6  | 78       | 3.6  |          |      | 96       | 5.3  | 30       | 6.0  | 72       | 3.6  | 341   | 4.7  | 3                  | BLUP       | -0.33           |
| G1         | P3163_kar2  | 4    | 52       | 4.9  |          |      | 68       | 3.1  | 71       | 4.2  |          |      | 52       | 3.6  | 243   | 3.9  | 3                  | BLUP       | -0.68           |
| G1         | P3164_kar3  | 5    | 30       | 3.8  | 62       | 2.5  | 34       | 2.3  | 44       | 3.4  |          |      | 73       | 3.4  | 243   | 3.1  | 1                  | BLUP       | -1.72           |
| G1         | P3165_kar4  | 6    | 45       | 5.4  | 72       | 4.2  | 69       | 3.7  | 80       | 5.0  | 26       | 4.5  | 33       | 4.2  | 325   | 4.5  | 3                  | BLUP       | -0.74           |
| G1         | P3166_kar5  | 5    | 34       | 3.9  | 51       | 3.2  | 67       | 2.6  |          |      | 27       | 3.6  | 117      | 2.6  | 296   | 2.9  | 1                  | BLUP       | -1.48           |
| G1         | P3167_kar6  | 6    | 85       | 5.0  | 71       | 2.5  | 73       | 2.4  | 104      | 3.8  | 31       | 4.5  | 124      | 2.5  | 488   | 3.3  | 1                  | BLUP       | -1.42           |
| G1         | P3168_kar7  | 5    | 70       | 5.5  | 54       | 3.2  | 49       | 3.3  | 92       | 4.6  | 29       | 4.7  |          |      | 294   | 4.4  | 3                  | BLUP       | -1.09           |
| G1         | P3169_kar8  | 6    | 50       | 4.3  | 78       | 2.7  | 41       | 3.5  | 90       | 3.3  | 26       | 3.9  | 90       | 3.0  | 375   | 3.3  | 2                  | BLUP       | -1.28           |
| G1         | P3170_kar10 | 3    | 41       | 5.9  | 72       | 2.5  | 60       | 2.7  |          |      |          |      |          |      | 173   | 3.4  | 2                  | BLUP       | -1.37           |
| G1         | P3171_kar11 | 2    | 23       | 4.8  |          |      | 54       | 2.9  |          |      |          |      |          |      | 77    | 3.5  | 2                  | BLUP       | -0.97           |
| G1         | P3172_kis1  | 6    | 71       | 5.5  | 47       | 2.5  | 84       | 3.4  | 83       | 4.4  | 56       | 5.7  | 104      | 3.8  | 445   | 4.2  | 3                  | BLUP       | -0.42           |
| G1         | P3173_kis2  | 6    | 60       | 5.2  | 58       | 3.8  | 132      | 3.0  | 104      | 3.9  | 32       | 4.3  | 34       | 3.5  | 420   | 3.8  | 2                  | BLUP       | -0.83           |
| G1         | P3086_yam1  |      |          |      |          |      |          |      |          |      |          |      |          |      |       |      | 2                  | z-score    | -1.00           |
| G1         | P3091_yam9  |      |          |      |          |      |          |      |          |      |          |      |          |      |       |      | 3                  | z-score    | -0.59           |
| G1         | P3107_kas1  |      |          |      |          |      |          |      |          |      |          |      |          |      |       |      | 4                  | z-score    | -0.17           |
| G2         | F1103_A-3   | 1    |          |      |          |      |          |      |          |      | 18       | 6.6  |          |      | 18    | 6.6  |                    | BLUP       | 0.21            |
| G2         | F1111_A-11  | 1    |          |      |          |      |          |      |          |      | 22       | 5.2  |          |      | 22    | 5.2  |                    | BLUP       | -0.66           |
| G2         | F1112_A-12  | 1    |          |      |          |      |          |      |          |      | 12       | 3.6  |          |      | 12    | 3.6  |                    | BLUP       | -0.35           |
| G2         | F1120_A-20  | 1    |          |      |          |      |          |      |          |      | 19       | 6.5  |          |      | 19    | 6.5  |                    | BLUP       | 0.43            |
| G2         | F1121_A-21  | 1    |          |      |          |      |          |      |          |      | 16       | 5.7  |          |      | 16    | 5.7  |                    | BLUP       | 0.48            |
| G2         | F1122_A-22  | 1    |          |      |          |      |          |      |          |      | 15       | 6.3  |          |      | 15    | 6.3  |                    | BLUP       | -0.93           |
| G2         | F1128_A-28  | 1    |          |      |          |      |          |      |          |      | 10       | 9.0  |          |      | 10    | 9.0  |                    | BLUP       | 0.55            |
| G2         | F1130_A-30  | 1    |          |      |          |      |          |      |          |      | 14       | 6.3  |          |      | 14    | 6.3  |                    | BLUP       | 0.46            |
| G2         | F1137_A-37  | 1    |          |      |          |      |          |      |          |      | 10       | 6.2  |          |      | 10    | 6.2  |                    | BLUP       | -0.45           |
| G2         | F1141_A-41  | 1    |          |      |          |      |          |      |          |      | 7        | 6.3  |          |      | 7     | 6.3  |                    | BLUP       | -0.66           |
| G2         | F1148_A-48  | 1    |          |      |          |      |          |      |          |      | 17       | 5.0  |          |      | 17    | 5.0  |                    | BLUP       | -0.41           |
| G2         | F1163_A-63  | 1    |          |      |          |      |          |      |          |      | 20       | 4.5  |          |      | 20    | 4.5  |                    | BLUP       | -0.31           |
| G2         | F1166_A-66  | 1    |          |      |          |      |          |      |          |      | 18       | 7.4  |          |      | 18    | 7.4  |                    | BLUP       | 1.01            |
| G2         | F1171_A-71  | 1    |          |      |          |      |          |      |          |      | 14       | 7.4  |          |      | 14    | 7.4  |                    | BLUP       | 0.91            |
| G2         | F1172_A-72  | 1    |          |      |          |      |          |      |          |      |          |      | 16       | 5.3  | 16    | 5.3  |                    | BLUP       | -0.06           |
| G2         | F1176_A-76  | 1    |          |      |          |      |          |      |          |      |          |      | 22       | 5.6  | 22    | 5.6  |                    | BLUP       | 1.12            |
| G2         | F1210_B-10  | 1    |          |      |          |      |          |      |          |      | 8        | 6.2  |          |      | 8     | 6.2  |                    | BLUP       | 0.59            |
| G2         | F1214_B-14  | 1    |          |      |          |      |          |      |          |      |          |      | 44       | 5.3  | 44    | 5.3  |                    | BLUP       | 1.41            |
| G2         | F1216_B-16  | 1    |          |      |          |      |          |      |          |      |          |      | 9        | 6.1  | 9     | 6.1  |                    | BLUP       | 0.97            |
| G2         | F1218_B-18  | 1    |          |      |          |      |          |      |          |      |          |      | 21       | 6.0  | 21    | 6.0  |                    | BLUP       | 1.71            |
| G2         | F1220_B-20  | 1    |          |      |          |      |          |      |          |      | 12       | 7.3  |          |      | 12    | 7.3  |                    | BLUP       | -0.42           |
| G2         | F1221_B-21  | 1    |          |      |          |      |          |      |          |      |          |      | 23       | 4.7  | 23    | 4.7  |                    | BLUP       | 0.16            |
| G2         | F1222_B-22  | 1    |          |      |          |      |          |      |          |      |          |      | 29       | 4.7  | 29    | 4.7  |                    | BLUP       | 0.40            |
| G2         | F1226_B-26  | 1    |          |      |          |      |          |      |          |      |          |      | 40       | 5.6  | 40    | 5.6  |                    | BLUP       | 0.71            |
| G2         | F1227_B-27  | 1    |          |      |          |      |          |      |          |      |          |      | 30       | 5.9  | 30    | 5.9  |                    | BLUP       | 0.67            |
| G2         | F1229_B-29  | 1    |          |      |          |      |          |      |          |      |          |      | 26       | 4.2  | 26    | 4.2  |                    | BLUP       | 0.52            |
| G2         | F1230_B-30  | 1    |          |      |          |      |          |      |          |      |          |      | 20       | 5.9  | 20    | 5.9  |                    | BLUP       | 1.17            |
| G2         | F1238_B-38  | 1    |          |      |          |      |          |      |          |      | 5        | 7.6  |          |      | 5     | 7.6  |                    | BLUP       | 0.24            |
| G2         | F1240_B-40  | 1    |          |      |          |      |          |      |          |      |          |      | 32       | 5.7  | 32    | 5.7  |                    | BLUP       | 0.45            |
| G2         | F1250_B-50  | 1    |          |      |          |      |          |      |          |      |          |      | 21       | 5.5  | 21    | 5.5  |                    | BLUP       | 1.72            |

**Table S2.** Numbers of individuals and mean tree heights (measured at 10 years of age in the 6 clonal test sites) that were used to calculate Clonal values for tree height.

| Generation | Clone           | Site | Site_110 |      | Site_111 |      | Site_112 |      | Site_113 |      | Site_115 |      | Site_116 |      | Total  |      | Published<br>score | statistics | Clonal<br>value |
|------------|-----------------|------|----------|------|----------|------|----------|------|----------|------|----------|------|----------|------|--------|------|--------------------|------------|-----------------|
|            |                 | N    | N        | Mean | N      | Mean |                    |            |                 |
| G2         | F1254_B-54      | 1    |          |      |          |      |          |      |          |      | 9        | 7.1  |          |      | 9      | 7.1  |                    | BLUP       | -0.62           |
| G2         | F1255_B-55      | 1    |          |      |          |      |          |      |          |      |          |      | 31       | 4.8  | 31     | 4.8  |                    | BLUP       | 1.01            |
| G2         | F1256_B-56      | 1    |          |      |          |      |          |      |          |      |          |      | 44       | 5.9  | 44     | 5.9  |                    | BLUP       | 0.94            |
| G2         | F1259_B-59      | 1    |          |      |          |      |          |      |          |      | 16       | 6.8  |          |      | 16     | 6.8  |                    | BLUP       | 0.45            |
| G2         | F1261_B-61      | 1    |          |      |          |      |          |      |          |      |          |      | 38       | 6.7  | 38     | 6.7  |                    | BLUP       | 1.13            |
| G2         | F1265_B-65      | 1    |          |      |          |      |          |      |          |      | 20       | 5.9  |          |      | 20     | 5.9  |                    | BLUP       | 0.12            |
| G2         | F1274_B-74      | 2    |          |      |          |      |          |      |          |      | 23       | 6.7  | 53       | 7.5  | 76     | 7.2  |                    | BLUP       | 1.22            |
| G2         | F1275_B-75      | 1    |          |      |          |      |          |      |          |      |          |      | 39       | 5.0  | 39     | 5.0  |                    | BLUP       | 0.43            |
| G2         | F1282_B-82      | 1    |          |      |          |      |          |      |          |      | 13       | 6.4  |          |      | 13     | 6.4  |                    | BLUP       | 0.66            |
| G2         | F1293_B-93      | 1    |          |      |          |      |          |      |          |      | 33       | 6.6  |          |      | 33     | 6.6  |                    | BLUP       | 0.46            |
| G2         | F1294_B-94      | 1    |          |      |          |      |          |      |          |      | 19       | 7.1  |          |      | 19     | 7.1  |                    | BLUP       | 0.71            |
| G2         | F1303_ima_33-11 | 1    |          |      |          |      | 51       | 3.9  |          |      |          |      |          |      | 51     | 3.9  |                    | BLUP       | -0.05           |
| G2         | F1304_ima_24-5  | 1    |          |      |          |      | 41       | 3.8  |          |      |          |      |          |      | 41     | 3.8  |                    | BLUP       | -0.03           |
| G2         | F1306_oom_05-06 | 1    |          |      | 76       | 4.0  |          |      |          |      |          |      |          |      | 76     | 4.0  |                    | BLUP       | -0.51           |
| G2         | F1307_oom_07-07 | 1    |          |      | 51       | 3.4  |          |      |          |      |          |      |          |      | 51     | 3.4  |                    | BLUP       | -1.39           |
| G2         | F1308_oom_31-03 | 1    |          |      | 32       | 3.4  |          |      |          |      |          |      |          |      | 32     | 3.4  |                    | BLUP       | -0.51           |
| G2         | F1309_oom_24-12 | 1    |          |      | 42       | 3.7  |          |      |          |      |          |      |          |      | 42     | 3.7  |                    | BLUP       | -0.48           |
| G2         | F1310_oom_20-04 | 1    |          |      | 36       | 4.8  |          |      |          |      |          |      |          |      | 36     | 4.8  |                    | BLUP       | 0.51            |
| G2         | F1312_oom_05-08 | 1    |          |      | 38       | 3.5  |          |      |          |      |          |      |          |      | 38     | 3.5  |                    | BLUP       | -0.40           |
| G2         | F1313_oom_05-03 | 1    |          |      | 42       | 3.0  |          |      |          |      |          |      |          |      | 42     | 3.0  |                    | BLUP       | -0.43           |
| G2         | F1314_oom_08-04 | 1    |          |      | 41       | 3.8  |          |      |          |      |          |      |          |      | 41     | 3.8  |                    | BLUP       | 0.26            |
| G2         | F1315_tar_11-01 | 1    |          |      | 13       | 3.8  |          |      |          |      |          |      |          |      | 13     | 3.8  |                    | BLUP       | -0.08           |
| G2         | F1316_tar_11-03 | 1    |          |      | 28       | 4.2  |          |      |          |      |          |      |          |      | 28     | 4.2  |                    | BLUP       | 0.13            |
| G2         | F1317_tar_08-12 | 1    |          |      | 40       | 4.6  |          |      |          |      |          |      |          |      | 40     | 4.6  |                    | BLUP       | 0.70            |
| G2         | F1318_tar_10-01 | 1    |          |      | 32       | 3.8  |          |      |          |      |          |      |          |      | 32     | 3.8  |                    | BLUP       | -0.37           |
| G2         | F1319_tar_08-06 | 1    |          |      | 19       | 4.6  |          |      |          |      |          |      |          |      | 19     | 4.6  |                    | BLUP       | -0.40           |
| G2         | F1320_tar_08-02 | 1    |          |      | 22       | 5.0  |          |      |          |      |          |      |          |      | 22     | 5.0  |                    | BLUP       | 0.40            |
| G2         | F1321_tar_13-10 | 1    |          |      | 28       | 4.6  |          |      |          |      |          |      |          |      | 28     | 4.6  |                    | BLUP       | -0.50           |
| G2         | F1322_tar_10-07 | 1    |          |      | 23       | 3.4  |          |      |          |      |          |      |          |      | 23     | 3.4  |                    | BLUP       | -0.92           |
| G2         | F1323_tar_08-09 | 1    |          |      | 20       | 4.5  |          |      |          |      |          |      |          |      | 20     | 4.5  |                    | BLUP       | -0.09           |
| G2         | F1324_tar_08-11 | 1    |          |      | 23       | 4.1  |          |      |          |      |          |      |          |      | 23     | 4.1  |                    | BLUP       | -0.11           |
| G2         | F1325_tar_10-06 | 1    |          |      | 38       | 4.2  |          |      |          |      |          |      |          |      | 38     | 4.2  |                    | BLUP       | -0.03           |
| G2         | F1327_ima-2     | 1    | 76       | 6.5  |          |      |          |      |          |      |          |      |          |      | 76     | 6.5  |                    | BLUP       | 0.02            |
| G2         | F1328_ima-3     | 1    | 8        | 7.7  |          |      |          |      |          |      |          |      |          |      | 8      | 7.7  |                    | BLUP       | 1.40            |
| G2         | F1329_ima-4     | 1    | 9        | 7.9  |          |      |          |      |          |      |          |      |          |      | 9      | 7.9  |                    | BLUP       | 1.00            |
| G2         | F1330_ima-5     | 1    | 44       | 7.6  |          |      |          |      |          |      |          |      |          |      | 44     | 7.6  |                    | BLUP       | 0.30            |
| G2         | F1331_ima-6     | 1    | 60       | 6.3  |          |      |          |      |          |      |          |      |          |      | 60     | 6.3  |                    | BLUP       | 0.28            |
| G2         | F1332_ima-7     | 1    | 69       | 7.4  |          |      |          |      |          |      |          |      |          |      | 69     | 7.4  |                    | BLUP       | 1.07            |
| G2         | F1333_ima-8     | 1    | 46       | 7.4  |          |      |          |      |          |      |          |      |          |      | 46     | 7.4  |                    | BLUP       | 0.63            |
| G2         | F1334_ima-9     | 1    | 49       | 7.1  |          |      |          |      |          |      |          |      |          |      | 49     | 7.1  |                    | BLUP       | 0.74            |
| G2         | F1335_ima-10    | 1    | 39       | 6.9  |          |      |          |      |          |      |          |      |          |      | 39     | 6.9  |                    | BLUP       | 0.70            |
| G2         | F1336_ima-11    | 1    | 83       | 7.2  |          |      |          |      |          |      |          |      |          |      | 83     | 7.2  |                    | BLUP       | 0.83            |
| G2         | F1337_ima-12    | 1    | 66       | 6.1  |          |      |          |      |          |      |          |      |          |      | 66     | 6.1  |                    | BLUP       | 0.07            |
| G2         | F1338_ima-13    | 1    | 14       | 5.8  |          |      |          |      |          |      |          |      |          |      | 14     | 5.8  |                    | BLUP       | 0.46            |
| G2         | F1339_ima-14    | 1    | 17       | 7.8  |          |      |          |      |          |      |          |      |          |      | 17     | 7.8  |                    | BLUP       | 0.85            |
| G2         | F1340_sef-1     | 1    | 45       | 7.3  |          |      |          |      |          |      |          |      |          |      | 45     | 7.3  |                    | BLUP       | 0.94            |
| G2         | F1341_sef-2     | 1    | 24       | 8.8  |          |      |          |      |          |      |          |      |          |      | 24     | 8.8  |                    | BLUP       | 1.62            |
| G2         | F1342_sef-3     | 1    | 25       | 8.1  |          |      |          |      |          |      |          |      |          |      | 25     | 8.1  |                    | BLUP       | 1.25            |
| G2         | F1343_sef-4     | 1    | 50       | 7.9  |          |      |          |      |          |      |          |      |          |      | 50     | 7.9  |                    | BLUP       | 1.57            |
| G2         | F1344_sef-5     | 1    | 43       | 7.0  |          |      |          |      |          |      |          |      |          |      | 43     | 7.0  |                    | BLUP       | 0.47            |
| G2         | F1345_sef-6     | 1    | 19       | 7.2  |          |      |          |      |          |      |          |      |          |      | 19     | 7.2  |                    | BLUP       | 0.71            |
| G2         | F1346_sef-7     | 1    | 36       | 8.2  |          |      |          |      |          |      |          |      |          |      | 36     | 8.2  |                    | BLUP       | 1.71            |
| G2         | F1347_sef-8     | 1    | 12       | 9.6  |          |      |          |      |          |      |          |      |          |      | 12     | 9.6  |                    | BLUP       | 1.37            |
| G2         | F1348_sef-9     | 1    | 88       | 8.4  |          |      |          |      |          |      |          |      |          |      | 88     | 8.4  |                    | BLUP       | 2.04            |
| G2         | F1349_sef-10    | 1    | 87       | 7.2  |          |      |          |      |          |      |          |      |          |      | 87     | 7.2  |                    | BLUP       | 0.72            |
| G2         | F1350_sef-11    | 1    | 49       | 6.5  |          |      |          |      |          |      |          |      |          |      | 49     | 6.5  |                    | BLUP       | 0.31            |
| G2         | F1351_sef-12    | 1    | 54       | 7.2  |          |      |          |      |          |      |          |      |          |      | 54     | 7.2  |                    | BLUP       | 0.82            |
| G2         | F1352_sef-13    | 1    | 52       | 7.0  |          |      |          |      |          |      |          |      |          |      | 52     | 7.0  |                    | BLUP       | 0.59            |
| G2         | F1353_sef-14    | 1    | 49       | 5.9  |          |      |          |      |          |      |          |      |          |      | 49     | 5.9  |                    | BLUP       | 0.21            |
| G2         | F1354_sef-15    | 1    | 54       | 7.0  |          |      |          |      |          |      |          |      |          |      | 54     | 7.0  |                    | BLUP       | 0.88            |
| G2         | F1355_sef-16    | 1    | 44       | 6.5  |          |      |          |      |          |      |          |      |          |      | 44     | 6.5  |                    | BLUP       | 0.68            |
| G2         | F1357_sef-18    | 1    | 15       | 7.0  |          |      |          |      |          |      |          |      |          |      | 15     | 7.0  |                    | BLUP       | 1.16            |
| G2         | F1358_sef-19    | 1    | 58       | 6.4  |          |      |          |      |          |      |          |      |          |      | 58     | 6.4  |                    | BLUP       | -0.21           |
| G2         | F1359_sef-20    | 1    | 22       | 7.1  |          |      |          |      |          |      |          |      |          |      | 22     | 7.1  |                    | BLUP       | 0.56            |
| G2         | F1361_sef-22    | 1    | 8        | 6.2  |          |      |          |      |          |      |          |      |          |      | 8      | 6.2  |                    | BLUP       | -0.07           |
| G1         | 44 clones       | 4.3  | 2,341    | 5.5  | 2,169    | 3.2  | 2,549    | 3.3  | 2,201    | 4.3  | 821      | 5.1  | 1,779    | 3.5  | 11,860 | 4.0  |                    |            | -0.72           |
| G2         | 95 clones       | 1.0  | 1,414    | 7.2  | 644      | 4.0  | 92       | 3.8  |          |      | 370      | 6.4  | 538      | 5.6  | 3,058  | 6.0  |                    |            | 0.42            |
| Total      |                 | 2.1  | 3,755    | 6.3  | 2,813    | 3.5  | 2,641    | 3.3  | 2,201    | 4.3  | 1,191    | 5.7  | 2,317    | 4.4  | 14,918 | 5.4  |                    |            | 0.04            |

These sites were settled based on randomized complete block designs with three replicates per clone. However, due to missing data the reported values for Site 116 are based on two replicates per clone.

The Published Score column shows the evaluated values listed in the characteristic table (Kyushu Forestry Research Association 1998) .

The statistics column shows the method used to calculate the Clonal value. BLUP denotes Best Linear Unbiased Prediction, while z-score denotes the method based on standardization values in conjunction with means and standard deviations.

The published scores of three G1 clones (P3086\_yam1, P3091\_yam9, P3107\_kas1) not planted in the clonal test sites were converted to Clonal values using a linear model relating the published scores of the 44 other G1 clones to the corresponding BLUP-derived Clonal values (see details in Supplementary Materials S1).
